# Supplementary material for: Selective recognition of ATP by multivalent nano-assemblies of bisimidazolium amphiphiles through “turn-on” fluorescence response
Source: publisher site journal article supplement (doi:10.3762/bjoc.16.223), 2020-11-10

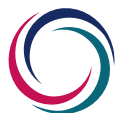

## Supporting Information

for

### **Selective recognition of ATP by multivalent nano-assemblies of bisimidazolium amphiphiles through “turn-on” fluorescence response**

Rakesh Biswas, Surya Ghosh, Shubhra Kanti Bhaumik and Supratim Banerjee

*Beilstein J. Org. Chem.* **2020**, *16*, 2728–2738. doi:10.3762/bjoc.16.223

### **Synthetic procedures, additional spectroscopic, microscopic and dynamic light scattering data (figures and tables) and NMR characterization**

| <b>Table of contents</b>                       | <b>Page No.</b> |
|------------------------------------------------|-----------------|
| <b>Synthetic procedures</b>                    | S03             |
| <b>Results and discussions</b>                 | S08             |
| <b>1. General spectroscopic studies</b>        | S08             |
| <b>2. Morphological study</b>                  | S11             |
| <b>3. Titration with phosphates in buffer</b>  | S11             |
| <b>4. Lifetime measurements</b>                | S14             |
| <b>5. Size and zeta potential measurements</b> | S16             |
| <b>6. NMR spectra</b>                          | S22             |

### Synthetic procedures:

**Pyren-1-ylmethanol (2):** In a 100 mL round bottom flask, **1** (600 mg, 2.60 mmol), and sodium borohydride (296 mg, 7.82 mmol) were dissolved in 30 mL ethanol and the yellow reaction mixture was refluxed for 3 h. After 3 h, it turned colorless. It was cooled to room temperature and a saturated Na<sub>2</sub>CO<sub>3</sub> solution (50 mL) was added to it. After stirring for 30 min, the reaction mixture was taken in separating funnel and extracted with DCM (5 x 100 mL). The organic layers were combined, dried over anhydrous Na<sub>2</sub>SO<sub>4</sub>, filtered and the solvent was evaporated in a rotary evaporator. The crude product was dried under high vacuum and was purified by a silica gel column using 30% EtOAc : hexane as the eluent. Product **2** was obtained as a white solid. Yield: 561 mg (93%). <sup>1</sup>H NMR (400 MHz, CDCl<sub>3</sub>): δ (ppm) = 8.39 (d, *J* = 9.2 Hz, 1H), 8.22-8.15 (m, 4H), 8.09-8.00 (m, 4H), 5.42 (s, 2H).

**1-(Bromomethyl)pyrene (3):** Compound **2** (563 mg, 2.42 mmol) was dissolved in 20 mL toluene in a 50 mL two necked round bottom flask equipped with a CaCl<sub>2</sub> guard tube and cooled in an ice-salt bath. Phosphorous tribromide (19.36 mmol) was added to the solution drop wise using a syringe and the reaction mixture was stirred at 0 °C. After 10 h, the colorless reaction mixture turned into a white suspension. After this, the reaction mixture was treated slowly with a saturated Na<sub>2</sub>CO<sub>3</sub> solution (30 mL) to neutralize the excess phosphorous tribromide and stirred for further 15 min at room temperature. Then the solution was taken in a separating funnel and the organic compound was extracted in toluene (4 x 100 mL). The light yellow colored organic layers were combined and was washed with water, brine and finally one more time with water. The yellow solution was dried over anhydrous Na<sub>2</sub>SO<sub>4</sub>, filtered and the solvent was evaporated in a rotary evaporator. Product **3** was obtained as a light yellow solid. Yield: 614 mg (86%). <sup>1</sup>H NMR (400 MHz, CDCl<sub>3</sub>): δ (ppm) = 8.39 (d, *J* = 9.2 Hz, 1H); 8.26-8.22 (m, 3H); 8.14-8.02 (m, 5H); 5.27 (s, 2H).

**Di(1*H*-imidazol-1-yl)methane (5):** Imidazole (**4**, 2 g, 29.4 mmol) and sodium hydride (1.4 g, 58.8 mmol) were taken in a 100 mL round bottom flask. Distilled DMF (10 mL) was added and the reaction mixture was stirred in an ice bath for 10 min. CH<sub>2</sub>Br<sub>2</sub> (11.76 mmol) was then slowly added into the reaction mixture and the stirring was continued for the next 48 h at room temperature. Solvent was then evaporated and the residue was taken in 50 mL water in a 250 mL separating funnel and extracted with dichloromethane (100 mL × 5). The organic phases were combined and dried over anhydrous Na<sub>2</sub>SO<sub>4</sub>. Then solvent was removed to get the desired product. The amount of product was 1.22 g. Yield = 70%. **<sup>1</sup>H NMR: (400 MHz, DMSO-*d*<sub>6</sub>):** δ (ppm) = 7.92 (s, 2H); 7.39 (s, 2H); 6.90 (s, 2H); 6.21 (s, 2H).

**BIm4: 5** (1.036 gm, 7 mmol) and 10 mL of DMF were taken in a 25 mL round bottom flask. 1-Bromobutane (0.7 mmol) was then added to it in portions at 2 h intervals with continuous stirring at 100 °C. After 12 h, the solvent was removed and the product was purified by two successive column chromatography using neutral alumina as the solid phase and 10–40% methanol/ethyl acetate as the eluent. Finally, the solvent was removed and the product was obtained as a semisolid. The amount of the product was 27 mg. Yield = 27%. **<sup>1</sup>H NMR (400 MHz, DMSO-*d*<sub>6</sub>):** δ (ppm) = 9.61 (s, 1H), 8.08 (s, 1H), 8.04 (s, 1H), 7.86 (s, 1H), 7.55 (s, 1H), 6.98 (s, 1H), 6.53 (s, 2H), 4.20 (t, *J* = 7.2 Hz, 2H), 1.77 (quint, *J* = 7.3 Hz, 2H), 1.24 (m, 2H), 0.88 (m, 3H). **<sup>13</sup>C NMR (125 MHz, DMSO-*d*<sub>6</sub>):** δ (ppm) = 137.88, 136.55, 129.67, 123.05, 121.87, 119.35, 56.74, 49.19, 48.93, 31.10, 30.49, 29.07, 25.12, 21.87, 18.78, 13.83, 13.28. **HRMS (ESI):** *m/z* calculated for C<sub>11</sub>H<sub>17</sub>N<sub>4</sub><sup>+</sup> 205.1448; found 205.1435.

**BIm10: 5** (602 mg, 4.07 mmol), 1-bromodecane (1.35 mmol) and 10 mL of DMF were taken in a 25 mL round bottom flask and stirred at 100 °C for 24 hours. Solvent was then removed and the product was purified by two successive column chromatography using neutral alumina as the solid phase and 20–50% methanol/ethyl acetate as the eluent. Finally, the solvent was removed and the product was obtained as a semisolid. The amount of the product was 298 mg.

Yield = 60%. **<sup>1</sup>H NMR: (400 MHz, CDCl<sub>3</sub>):**  $\delta$  (ppm) = 10.31 (s, 1H); 7.71 (s, 1H); 7.43 (s, 1H); 7.16 (s, 1H); 7.01 (s, 1H); 6.73 (s, 2H); 4.17 (t, 2H,  $J$  = 7.6 Hz); 1.83 (m, 2H); 1.29-1.23 (m, 14H); 0.85 (t, 3H,  $J$  = 7.2 Hz). **<sup>13</sup>C NMR: (100 MHz, CDCl<sub>3</sub>):**  $\delta$  (ppm) = 138.08, 130.27, 122.06, 121.99, 121.90, 119.54, 57.65, 50.46, 31.93, 30.05, 29.53, 29.43, 29.32, 29.00, 26.31, 22.75, 14.18. **HRMS (ESI):**  $m/z$  calculated for C<sub>17</sub>H<sub>29</sub>N<sub>4</sub><sup>+</sup> 289.2387; found 289.2396.

**BIm12: 5** (600 mg, 4.04 mmol), 1-bromododecane (0.320 ml, 1.34 mmol,) and 10 mL of DMF were taken in a 25 mL round bottom flask and stirred at 100 °C for 24 hours. Solvent was then removed and the product was purified by two successive column chromatography using neutral alumina as the solid phase and 20–50% methanol/ethyl acetate as the eluent. Finally, the solvent was removed and the product was obtained as a semisolid. The amount of the product was 329 mg. Yield = 62%. **<sup>1</sup>H NMR: (400 MHz, DMSO- *d*<sub>6</sub>):**  $\delta$  (ppm) = 10.05 (s, 1H); 8.08 (d,  $J$  = 7.6 Hz, 2H); 7.84 (s, 1H); 7.56 (s, 1H); 6.95 (s, 1H); 6.59 (s, 2H); 4.18 (t,  $J$  = 6.8 Hz, 2H); 1.30-1.15 (m, 18H); 0.84 (t,  $J$  = 6.8 Hz, 3H). **<sup>13</sup>C NMR: (100 MHz, DMSO-*d*<sub>6</sub>):**  $\delta$  (ppm) = 173.82; 137.93; 137.31; 129.56; 122.93; 121.91; 119.35; 56.63; 49.11; 31.30; 29.02; 28.93; 28.83; 28.72; 28.35; 25.49; 23.82; 22.10; 13.93. **HRMS (ESI):**  $m/z$  calculated for C<sub>19</sub>H<sub>33</sub>N<sub>4</sub><sup>+</sup>: 317.2700; found 317.2692.

**BIm14: 5** (600 mg, 4.04 mmol), 1-bromotetradecane (0.4 ml, 1.346 mmol) and 10 mL of DMF were taken in a 25 mL round bottom flask and stirred at 100 °C for 24 hours. Solvent was then removed and the product was purified by two successive column chromatography using neutral alumina as the solid phase and 20–50% methanol/ ethyl acetate as the eluent. Finally, the solvent was removed and the product was obtained as a semisolid. The amount of the product obtained was 399 mg. Yield = 70%. **<sup>1</sup>H NMR: (400 MHz, CDCl<sub>3</sub>):**  $\delta$  (ppm) = 10.47 (s, 1H); 8.07 (s, 1H); 7.81 (s, 1H); 7.45 (s, 1H); 7.16 (s, 1H); 6.96 (s, 1H); 6.77 (s, 2H); 4.15 (t,  $J$  = 7.2 Hz, 2H); 1.96 (m, 2H); 1.27-1.22 (m, 22 H); 0.85 (t,  $J$  = 7.2 Hz, 3H). **<sup>13</sup>C NMR: (100 MHz, DMSO-*d*<sub>6</sub>):**  $\delta$  (ppm) = 173.19; 137.90; 136.82; 129.69; 123.05; 121.90; 119.33; 79.22; 56.81;

49.20; 31.33; 29.16; 29.05; 28.96; 28.85; 28.74; 28.37; 25.51; 22.66; 22.13; 13.98. **HRMS (ESI):** m/z calculated for  $C_{21}H_{37}N_4^+$ : 345.3013; found 345.3013.

**PBImN** ( $N = 4, 10, 12, 14$ ): In a typical procedure, **BImN** ( $N = 4, 10, 12$  and  $14$ ; 1 equiv.), **3** (1.5 equiv.) and 1 mL of toluene were taken in a 5 mL round bottom flask and stirred at reflux condition for 48 hours. The light-yellow precipitates were filtered and washed with toluene for five times. The residues were finally dried under vacuum.

**PBIm4:** From 25 mg of **BIm4**, 26 mg of **PBIm4** was obtained as a light-yellow powder. Yield = 50%.  **$^1H$  NMR (400 MHz, DMSO- $d_6$ ):  $\delta$  (ppm)** = 9.59 (s, 1H); 9.54 (s, 1H); 8.48-8.35 (m, 4H); 8.28-8.11 (m, 5H), 8.04 (s, 1H), 8.00 (s, 1H), 7.89 (s, 1H), 6.68 (s, 2H), 6.30 (s, 2H), 4.21 (t,  $J = 7.2$  Hz, 2H), 1.80-1.74 (m, 2H), 1.22-1.15 (m, 2H), 0.91-0.84 (m, 3H).  **$^{13}C$  NMR (125 MHz, DMSO- $d_6$ ):  $\delta$  (ppm)** = 138.27, 138.0, 132.20, 131.20, 130.66, 129.42 129.31, 128.87, 127.78, 127.27, 127.19, 126.63, 126.40, 125.75, 124.64, 124.16, 124.06, 123.66, 122.96, 122.69, 58.88, 50.82, 49.72, 49.53, 31.50, 30.92, 29.66, 19.33, 14.22, 13.67. **HRMS (ESI):** m/z calculated for  $C_{28}H_{28}N_4^{2+}$  (M-Na): 221.6101; found: 221.6045.

**PBIm10:** From 60 mg of **BIm10**, 68 mg of **PBIm10** was obtained as a light-yellow powder. Yield = 63%.  **$^1H$  NMR (400 MHz, DMSO- $d_6$ ):  $\delta$ (ppm)** = 9.68 (s, 1H); 9.61 (s, 1H); 8.51-8.49 (d,  $J = 8$  Hz, 1H,); 8.41- 8.34 (m, 4H); 8.30- 8.22 (m, 3H); 8.16 -8.12 (m, 2H); 8.09 (s, 1H); 8.01 (s, 1H); 7.91 (s, 1H); 6.68 (s, 2H); 6.32 (s, 2H); 4.20 (t,  $J = 8$  Hz, 2H); 1.77 (m, 2H); 1.35-1.15 (m, 14H); 0.84 (t,  $J = 8$  Hz, 3H).  **$^{13}C$  NMR (100 MHz, DMSO- $d_6$ ):  $\delta$  (ppm)** = 137.79; 137.90; 131.67; 130.68; 130.14; 128.80; 128.39; 128.31; 127.26; 126.71; 126.08; 125.87; 125.23; 124.12; 123.65; 123.49; 123.13; 122.15; 58.17; 50.46; 49.28; 31.27; 29.10; 28.89; 28.82; 28.66; 28.38; 25.46; 22.09 **HRMS (ESI):** m/z calculated for  $C_{34}H_{40}N_4^{2+}$  (M+H $^+$ ): 252.1621; found 252.1605.

**PBIm12:** From 90 mg of **BIm12**, 122 mg of **PBIm12** was obtained as a light yellow compound. Yield = 77%.  **$^1H$  NMR: (400 MHz, DMSO-  $d_6$ ):  $\delta$  (ppm)** = 9.64 (s, 1H); 9.57 (s, 1H); 8.51-

8.48 (m, 1H); 8.41- 8.34 (m, 4H); 8.29- 8.20 (m, 3H); 8.17- 8.13 (m, 2H); 8.06 (s, 1H); 8.00 (s, 1H); 7.89 (s, 1H); 4.19 (t,  $J = 8$  Hz, 2H); 1.76 (m, 2H); 1.21 (m, 17H); 0.83 (t,  $J = 8$  Hz, 3H).

**$^{13}\text{C}$  NMR: (100 MHz, DMSO- $d_6$ ):**  $\delta$ (ppm) = 137.79; 137.49; 131.76; 130.71; 130.15; 127.27; 126.75; 128.39; 126.75; 126.12; 125.89; 125.25; 123.74; 123.68; 123.52; 123.16; 122.45; 122.17; 58.22; 50.48; 49.30; 31.29; 29.11; 29.01; 28.95; 28.83; 28.71; 28.39; 25.47; 22.10.

**HRMS (ESI):**  $m/z$  calculated for  $\text{C}_{36}\text{H}_{44}\text{N}_4^{2+}$  ( $\text{M}+\text{H}^+$ ): 531.3477; found 531.3441.

**PBI<sub>14</sub>**: From 53 mg of **BIm<sub>14</sub>**, 63 mg of **PBI<sub>14</sub>** was obtained as a light-yellow compound.

Yield = 70%.  **$^1\text{H}$  NMR: (400 MHz, DMSO- $d_6$ ):**  $\delta$  (ppm) = 9.70 (s, 1H); 9.63 (s, 1H); 8.51-8.49 (d,  $J = 8$  Hz, 1H); 8.41-8.34 (m, 4H); 8.29-8.21 (m, 3H); 8.16-8.13 (m, 2H); 8.10 (s, 1H); 8.01 (s, 1H); 7.90 (s, 1H); 4.20 (t,  $J = 8$  Hz, 2H); 1.77 (m, 2H); 0.83 (t,  $J = 8$  Hz, 3H)  **$^{13}\text{C}$  NMR: (100 MHz, DMSO- $d_6$ ):**  $\delta$  (ppm) = 137.80; 137.90; 131.66; 130.67; 130.14; 128.79; 128.37; 128.30; 127.25; 126.71; 126.07; 125.85; 125.22; 124.11; 123.66; 123.47; 123.11; 122.43; 122.15; 58.15; 49.27; 31.28; 29.09; 29.04; 29.01; 28.95; 28.82; 28.70; 28.39; 25.47; 22.08; 13.96. **HRMS (ESI):**  $m/z$  calculated for  $\text{C}_{38}\text{H}_{48}\text{N}_4^{2+}$  ( $\text{M}+\text{H}^+$ ): 559.3790; found 559.3785.

## Results and discussions:

### 1. General spectroscopic studies:

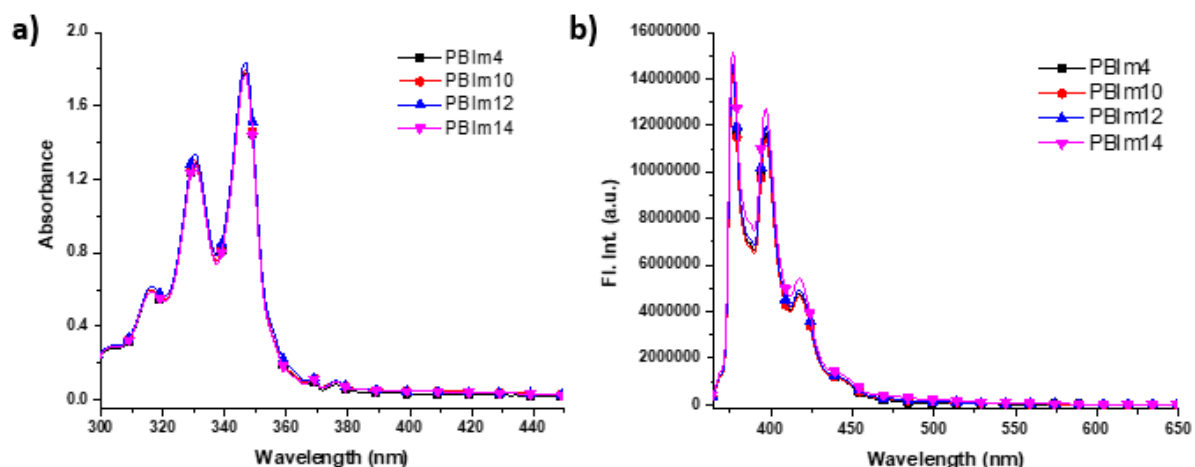

**Figure S1.** (a) Absorption spectra and (b) emission spectra of **PBIm4**, **PBIm10**, **PBIm12** and **PBIm14** (50  $\mu\text{M}$  of each) in DMSO ( $\lambda_{\text{ex}} = 350$  nm).

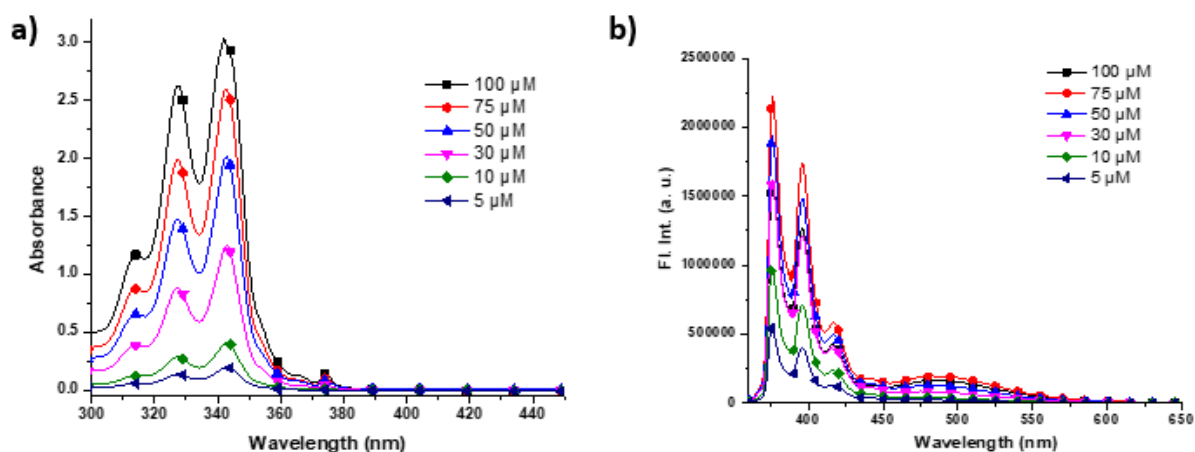

**Figure S2.** (a) Absorption spectra and (b) emission spectra ( $\lambda_{\text{ex}} = 350$  nm) of **PBIm4** at different concentration in aqueous buffer (5 mM tris in 10 mM NaCl, pH 7.4).

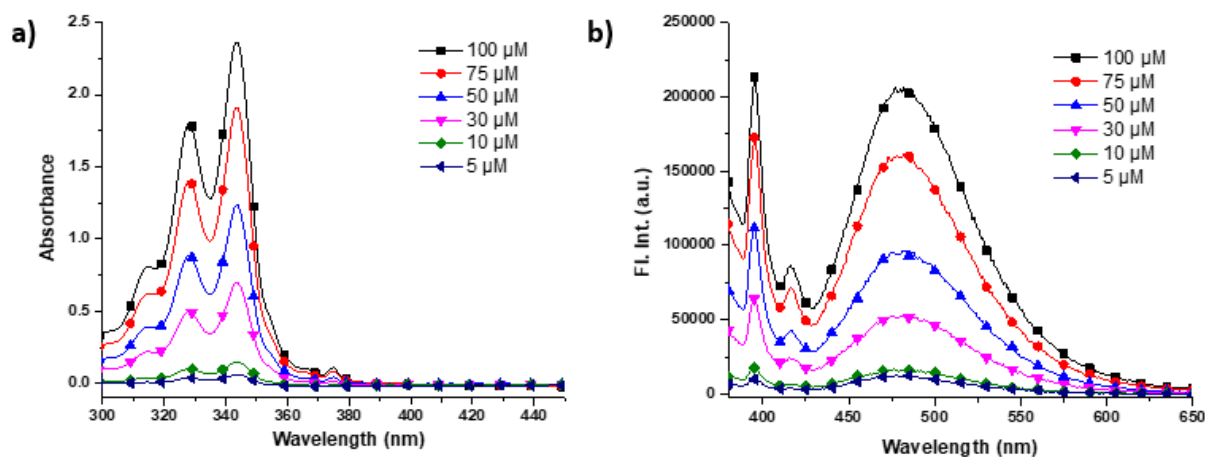

**Figure S3.** (a) Absorption spectra and (b) emission spectra ( $\lambda_{\text{ex}} = 365$  nm) of **PBIm10** at different concentration in aqueous buffer (5 mM tris in 10 mM NaCl, pH 7.4).



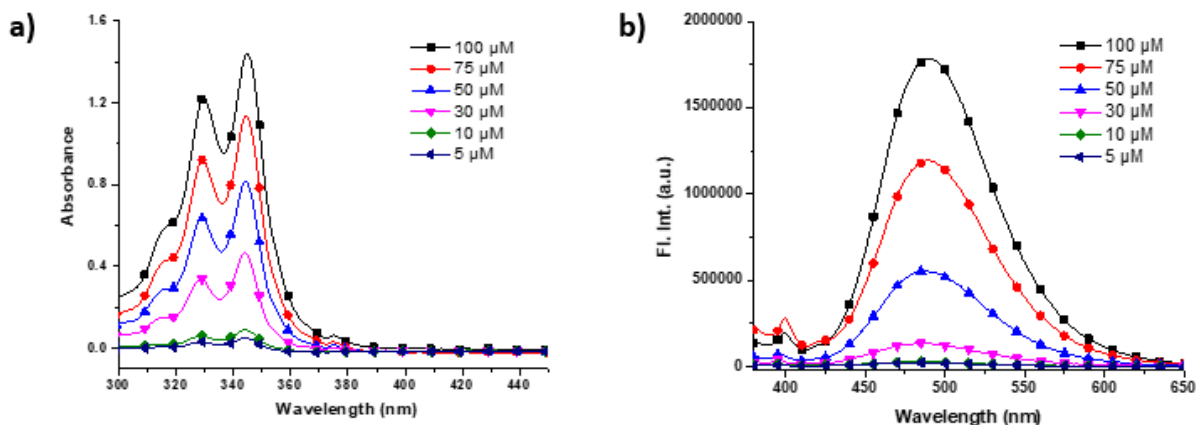

**Figure S4.** (a) Absorption spectra and (b) emission spectra ( $\lambda_{\text{ex}} = 365 \text{ nm}$ ) of **PBIIm14** at different concentration in aqueous buffer (5 mM tris in 10 mM NaCl, pH 7.4).

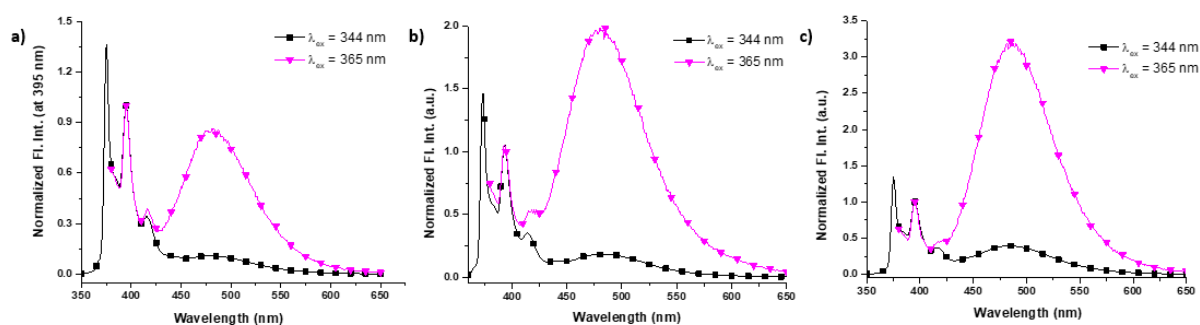

**Figure S5.** Emission spectra of (a) **PBIIm10** (50  $\mu\text{M}$ ), (b) **PBIIm12** (75  $\mu\text{M}$ ) and (c) **PBIIm14** (30  $\mu\text{M}$ ) upon excited with different wavelengths of light in aqueous buffer (5 mM tris in 10 mM NaCl, pH 7.4).

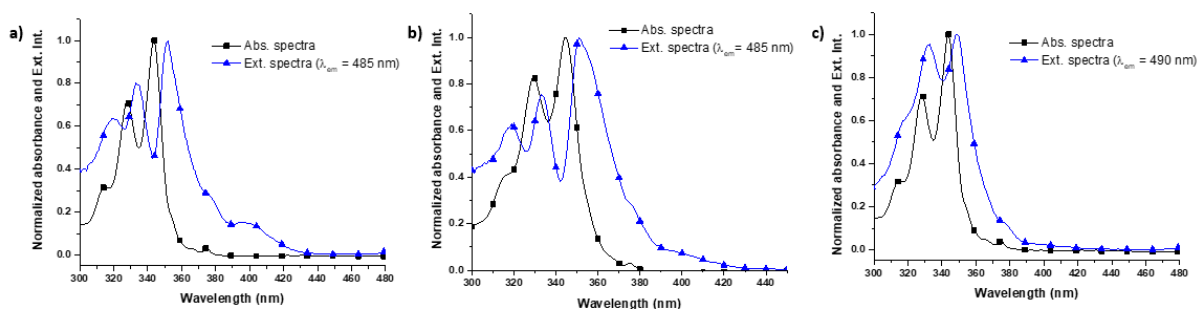

**Figure S6.** Absorption spectra excitation spectra of (a) **PBIIm10** (50  $\mu\text{M}$ ), (b) **PBIIm12** (75  $\mu\text{M}$ ) and (c) **PBIIm14** (30  $\mu\text{M}$ ) in aqueous buffer (5 mM tris in 10 mM NaCl, pH 7.4).

**Table S1.**  $A_{0-0}/A_{0-1}$  ratios for **PBIIm4**, **PBIIm10**, **PBIIm12** and **PBIIm14** at different concentrations in aqueous buffer (5 mM tris in 10 mM NaCl, pH 7.4).

| <b>PBIImN derivatives (in buffer)</b> | <b><math>A_{0-0}/A_{0-1}</math> at 50 <math>\mu</math>M</b> | <b><math>A_{0-0}/A_{0-1}</math> at 30 <math>\mu</math>M</b> | <b><math>A_{0-0}/A_{0-1}</math> at 10 <math>\mu</math>M</b> | <b><math>A_{0-0}/A_{0-1}</math> at 5 <math>\mu</math>M</b> |
|---------------------------------------|-------------------------------------------------------------|-------------------------------------------------------------|-------------------------------------------------------------|------------------------------------------------------------|
| <b>PBIIm4</b>                         | 1.37                                                        | 1.426                                                       | 1.452                                                       | 1.467                                                      |
| <b>PBIIm10</b>                        | 1.385                                                       | 1.396                                                       | 1.49                                                        | 1.63                                                       |
| <b>PBIIm12</b>                        | 1.395                                                       | 1.40                                                        | 1.48                                                        | 1.59                                                       |
| <b>PBIIm14</b>                        | 1.28                                                        | 1.38                                                        | 1.47                                                        | 1.60                                                       |

**Table S2.** Average lifetime ( $\tau_{\text{avg}}$ ) values of **PBIIm4**, **PBIIm10**, **PBIIm12** and **PBIIm14** in DMSO ( $\lambda_{\text{ex}} = 340$  nm).

| <b>PBIImN derivative (50 <math>\mu</math>M)</b> | <b><math>\lambda_{\text{em}}</math>(nm)</b> | <b><math>\tau_{\text{avg}}</math> (ns)</b> |
|-------------------------------------------------|---------------------------------------------|--------------------------------------------|
| <b>PBIIm4</b>                                   | 395                                         | 81.04                                      |
| <b>PBIIm10</b>                                  | 395                                         | 79.53                                      |
| <b>PBIIm12</b>                                  | 395                                         | 80.31                                      |
| <b>PBIIm14</b>                                  | 395                                         | 79.30                                      |

**Table S3.** Average lifetime ( $\tau_{\text{avg}}$ ) values of **PBIIm4**, **PBIIm10**, **PBIIm12** and **PBIIm14** in aqueous buffer (5 mM TRIS in 10 mM NaCl, pH 7.4,  $\lambda_{\text{ex}} = 340$  nm).

| <b>PBIImN derivative</b>               | <b><math>\lambda_{\text{em}}</math> (nm)</b> | <b><math>\tau_{\text{avg}}</math> (ns)</b> |
|----------------------------------------|----------------------------------------------|--------------------------------------------|
| <b>PBIIm4 (50 <math>\mu</math>M)</b>   | 395                                          | 15.08                                      |
| <b>PBIIm10 (100 <math>\mu</math>M)</b> | 395                                          | 31.9                                       |
|                                        | 481                                          | 33.97                                      |
| <b>PBIIm12 (75 <math>\mu</math>M)</b>  | 395                                          | 26.35                                      |
|                                        | 485                                          | 34.44                                      |
| <b>PBIIm14 (50 <math>\mu</math>M)</b>  | 395                                          | 15.83                                      |
|                                        | 490                                          | 33.27                                      |

## 2. Morphological study:

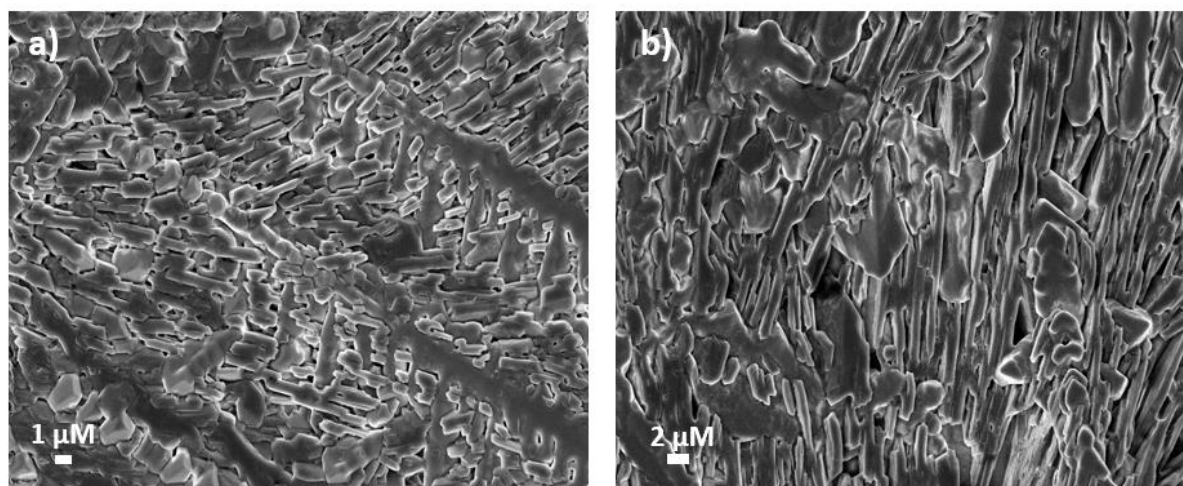

**Figure S7.** FESEM Images of (a) **PBIIm10** and (b) **PBIIm14**.

## 3. Titration with phosphates in buffer:

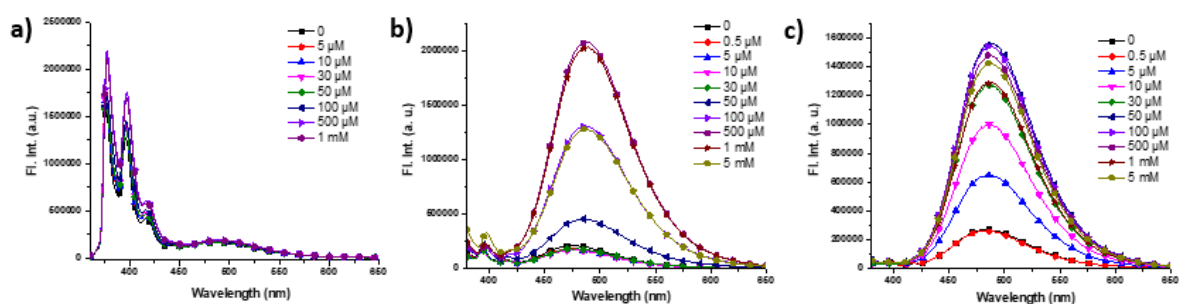

**Figure S8.** Emission spectral changes of (a) **PBIIm4** (100  $\mu\text{M}$ ) ( $\lambda_{\text{ex}} = 350 \text{ nm}$ ), (b) **PBIIm10** (100  $\mu\text{M}$ ) ( $\lambda_{\text{ex}} = 365 \text{ nm}$ ) and (c) **PBIIm14** (30  $\mu\text{M}$ ) ( $\lambda_{\text{ex}} = 365 \text{ nm}$ ) upon addition of ATP in aqueous buffer (5 mM TRIS in 10 mM NaCl, pH 7.4).

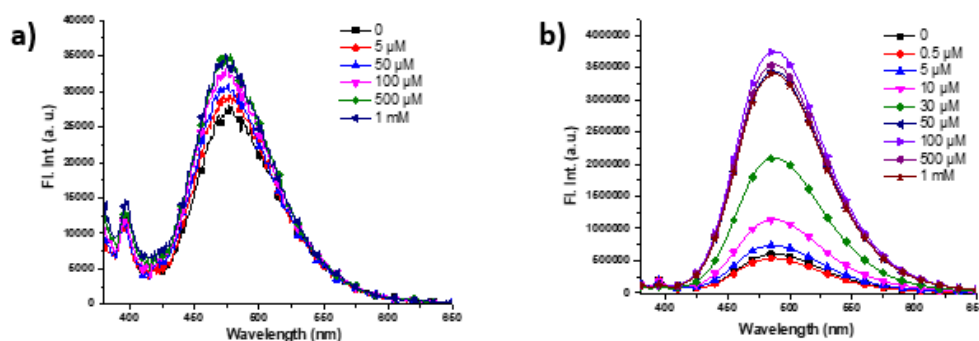

**Figure S9.** Emission spectral changes of **PBIIm12** at (a) 1  $\mu\text{M}$  and (b) 125  $\mu\text{M}$  upon addition of ATP in aqueous buffer (5 mM TRIS in 10 mM NaCl, pH 7.4). ( $\lambda_{\text{ex}} = 365 \text{ nm}$ ).

**Table S4.** Average lifetime ( $\tau_{\text{avg}}$ ) values of **PBI**m4, **PBI**m10, **PBI**m12 and **PBI**m14 in presence of ATP in aqueous buffer (5 mM TRIS in 10 mM NaCl, pH 7.4). ( $\lambda_{\text{ex}} = 340$  nm)

| <b>PBI</b> mN derivative     | $\lambda_{\text{em}}$ (nm) | $\tau_{\text{avg}}$ with ATP<br>(100 $\mu$ M) (ns) |
|------------------------------|----------------------------|----------------------------------------------------|
| <b>PBI</b> m4 (50 $\mu$ M)   | 395                        | -                                                  |
| <b>PBI</b> m10 (100 $\mu$ M) | 395                        | 17.99                                              |
|                              | 481                        | 35.81                                              |
| <b>PBI</b> m12 (75 $\mu$ M)  | 395                        | 18.73                                              |
|                              | 485                        | 41.99                                              |
| <b>PBI</b> m14 (50 $\mu$ M)  | 395                        | 60.17                                              |
|                              | 490                        | 40.96                                              |

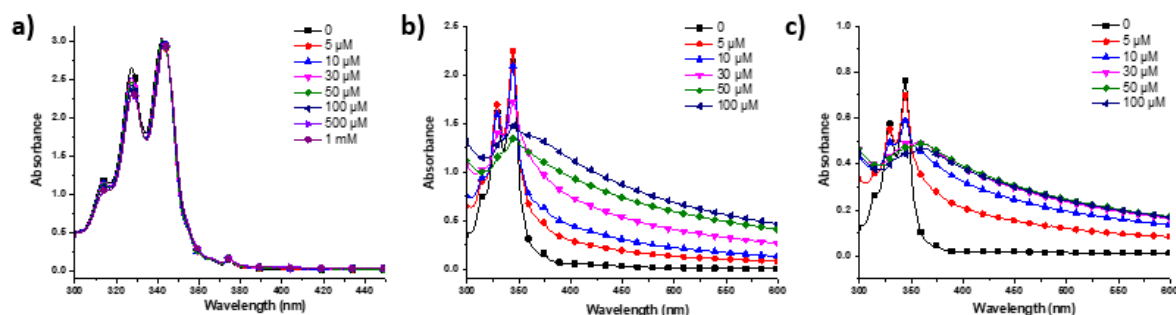

**Figure S10.** Absorption spectral changes of (a) **PBI**m4 (100  $\mu$ M), (b) **PBI**m12 (75  $\mu$ M) and (c) **PBI**m14 (30  $\mu$ M) upon addition of sodium salt of ATP in aqueous buffer (5 mM tris in 10 mM NaCl, pH 7.4).

**Table S5.**  $A_{0-0}/A_{0-1}$  ratios for **PBI**m12 (75  $\mu$ M) and **PBI**m14 (30  $\mu$ M) in absence and in the presence of ATP in aqueous buffer (5 mM tris in 10 mM NaCl, pH 7.4)

| <b>PBI</b> mN derivatives (in buffer) | $A_{0-0}/A_{0-1}$<br>In absence of ATP | $A_{0-0}/A_{0-1}$<br>In presence of ATP (5 $\mu$ M) | $A_{0-0}/A_{0-1}$<br>In presence of ATP (10 $\mu$ M) | $A_{0-0}/A_{0-1}$<br>In presence of ATP (30 $\mu$ M) |
|---------------------------------------|----------------------------------------|-----------------------------------------------------|------------------------------------------------------|------------------------------------------------------|
| <b>PBI</b> m12 (75 $\mu$ M)           | 1.318                                  | 1.326                                               | 1.317                                                | 1.217                                                |
| <b>PBI</b> m14 (30 $\mu$ M)           | 1.325                                  | 1.269                                               | 1.188                                                | 1.103                                                |

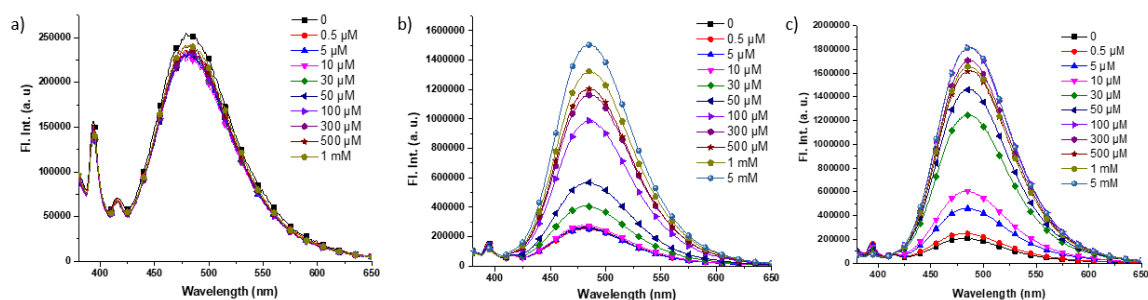

**Figure S11.** Emission spectral changes of **PBIm12** (75 μM) upon addition of (a) AMP (0.5 μM-1 mM), (b) ADP (0.5 μM-5 mM) and (c) PPI (0.5 μM-5 mM) in aqueous buffer (5 mM tris in 10 mM NaCl, pH 7.4) ( $\lambda_{\text{ex}} = 365$  nm).

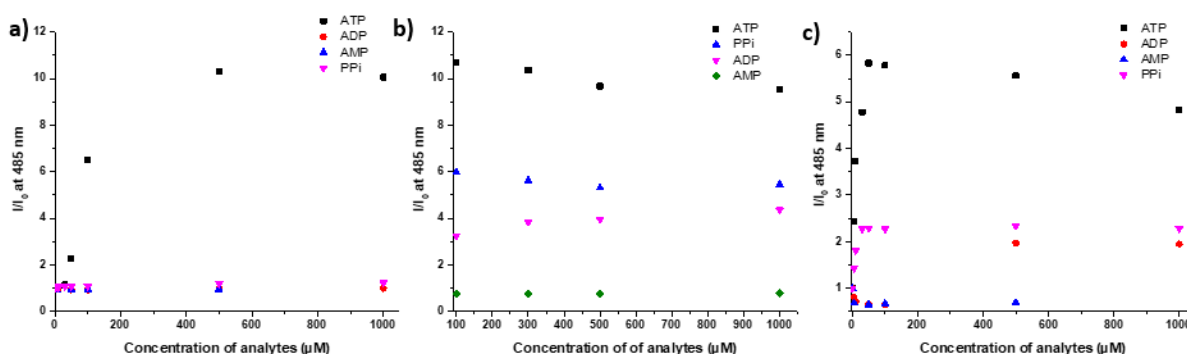

**Figure S12.** Change in  $I/I_0$  of (a) **PBIm10** (100 μM), (b) **PBIm12** (75 μM) and (b) **PBIm14** (30 μM) upon addition of different analytes in aqueous buffer (5 mM tris in 10 mM NaCl, pH 7.4) ( $\lambda_{\text{ex}} = 365$  nm).

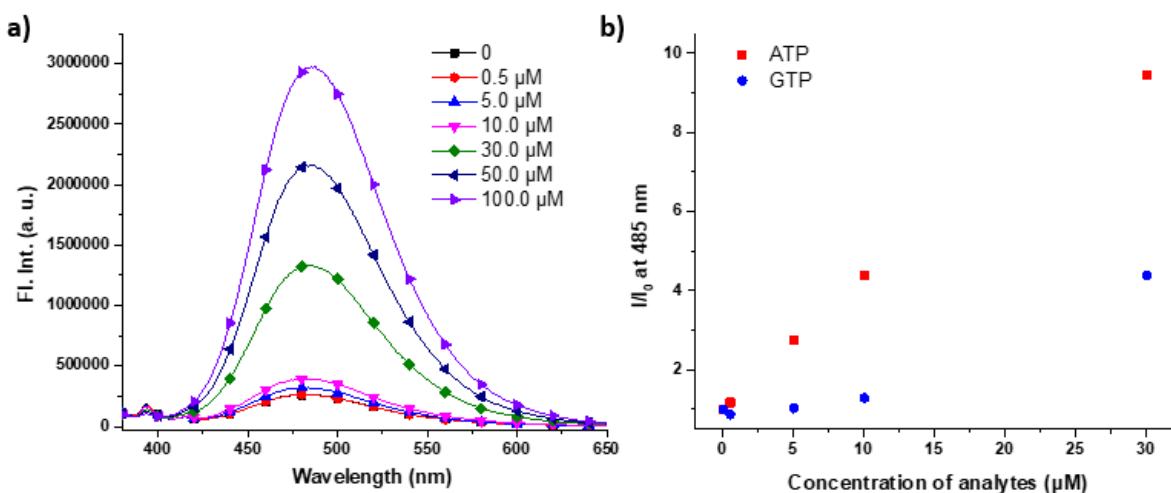

**Figure S13.** (a) Emission spectral changes of **PBIm12** (75 μM) upon addition of GTP (0.5 μM-100 μM) in aqueous buffer (5 mM tris in 10 mM NaCl, pH 7.4) ( $\lambda_{\text{ex}} = 365$  nm). (b) Change in  $I/I_0$  of **PBIm12** (75 μM) upon addition of ATP and GTP in aqueous buffer.

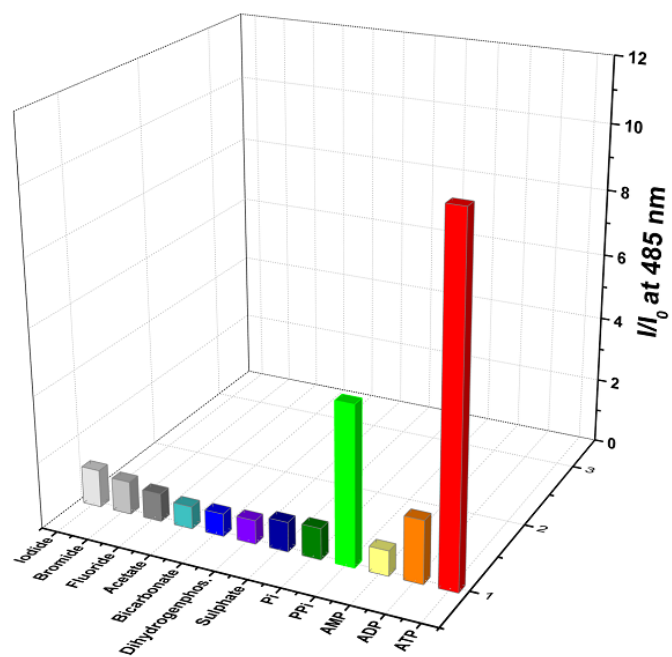

**Figure S14.** Bar diagram of **PBIIm12** (75  $\mu$ M) upon addition of different anions (50  $\mu$ M) in aqueous buffer (5 mM Tris in 10 mM NaCl, pH 7.4) ( $\lambda_{\text{ex}} = 365$  nm).

#### 4. Lifetime measurements:

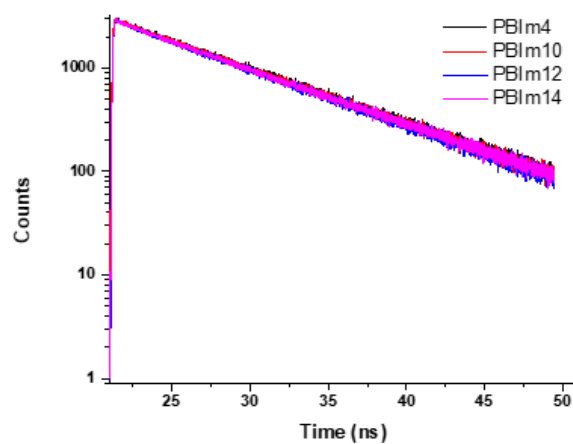

**Figure S15.** Time resolved decay curves of **PBIIm4**, **PBIIm10**, **PBIIm12** and **PBIIm14** (50  $\mu$ M of each) in DMSO ( $\lambda_{\text{ex}} = 340$  nm).

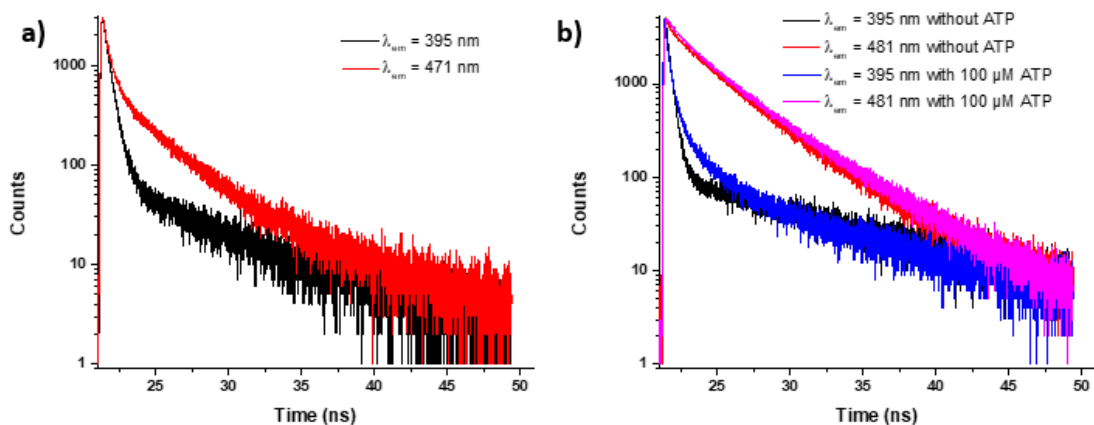

**Figure S16.** (a) Time resolved decay curves of **PBIm4** (100  $\mu$ M) in aqueous buffer. (b) Time resolved decay curves of **PBIm10** (100  $\mu$ M) in absence and in presence of ATP in aqueous buffer. ( $\lambda_{\text{ex}} = 340$  nm).

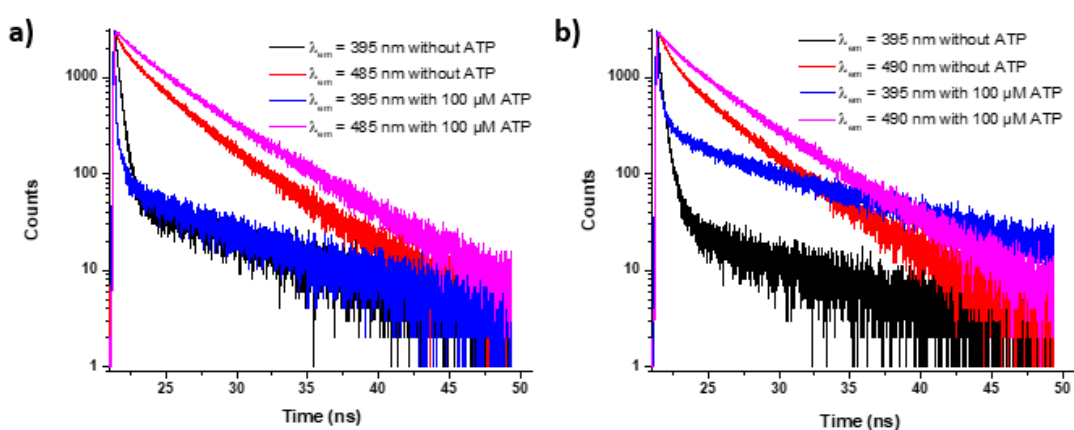

**Figure S17.** Time resolved decay curves of (a) **PBIm12** (75  $\mu$ M) and (b) **PBIm14** (30  $\mu$ M) in absence and in presence of ATP in aqueous buffer. ( $\lambda_{\text{ex}} = 340$  nm)

## 5. Size and zeta potential measurements:

### A. Size of PBI<sub>m</sub>10 (150 $\mu$ M)

#### Results

|                                                 | Size (d.nm):         | % Intensity: | St Dev (d.nm): |
|-------------------------------------------------|----------------------|--------------|----------------|
| <b>Z-Average (d.nm):</b> 602.6                  | <b>Peak 1:</b> 545.0 | 98.6         | 145.7          |
| <b>Pdl:</b> 0.355                               | <b>Peak 2:</b> 5560  | 1.4          | 6.104e-5       |
| <b>Intercept:</b> 0.937                         | <b>Peak 3:</b> 0.000 | 0.0          | 0.000          |
| <b>Result quality :</b> Refer to quality report |                      |              |                |

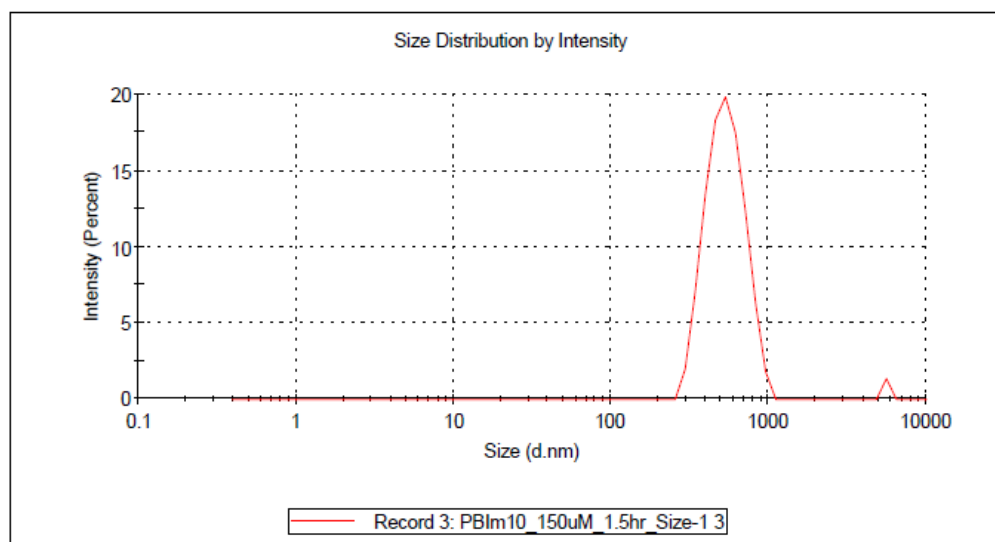

### B. Size of PBI<sub>m</sub>12 (75 $\mu$ M)

#### Results

|                                | Size (d.nm):         | % Intensity: | St Dev (d.nm): |
|--------------------------------|----------------------|--------------|----------------|
| <b>Z-Average (d.nm):</b> 689.2 | <b>Peak 1:</b> 818.5 | 85.3         | 432.9          |
| <b>Pdl:</b> 0.450              | <b>Peak 2:</b> 4854  | 8.4          | 742.0          |
| <b>Intercept:</b> 0.956        | <b>Peak 3:</b> 153.7 | 6.3          | 39.09          |
| <b>Result quality :</b> Good   |                      |              |                |

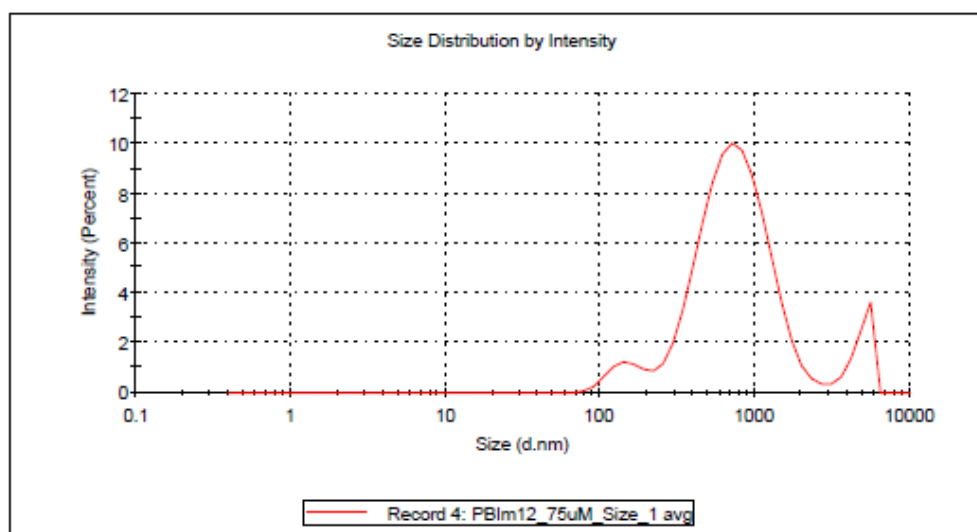



### C. Size of PBI<sub>m</sub>14 (50 $\mu$ M)

#### Results

|                                          | Size (d.nm):  | % Intensity: | St Dev (d.nm): |
|------------------------------------------|---------------|--------------|----------------|
| Z-Average (d.nm): 621.3                  | Peak 1: 118.8 | 94.1         | 20.16          |
| Pdl: 0.657                               | Peak 2: 5.263 | 5.9          | 1.157          |
| Intercept: 0.566                         | Peak 3: 0.000 | 0.0          | 0.000          |
| Result quality : Refer to quality report |               |              |                |

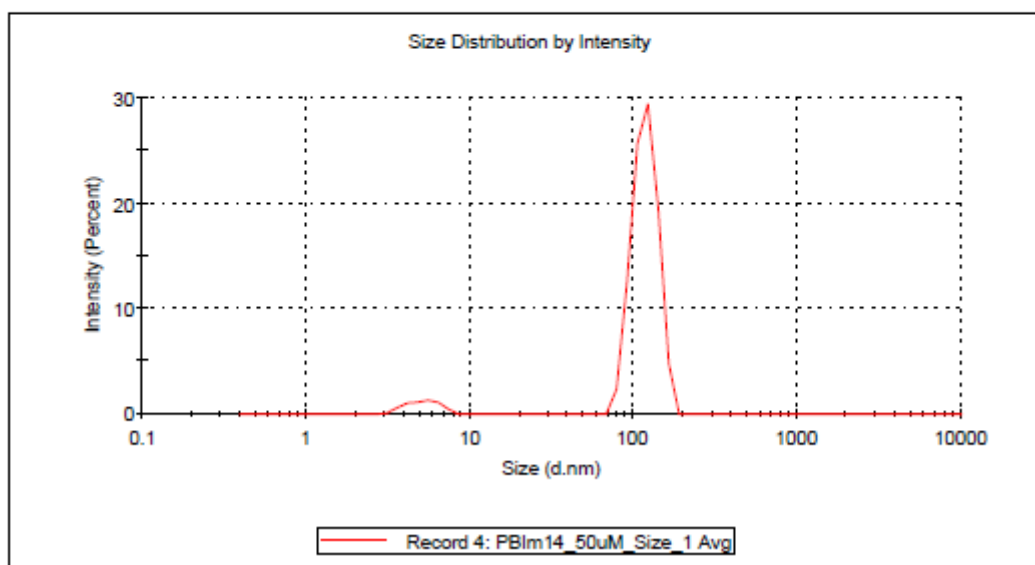

### D. Size of PBI<sub>m</sub>10 (150 $\mu$ M) with ATP (100 $\mu$ M)

#### Results

|                                          | Size (d.nm):  | % Intensity: | St Dev (d.nm): |
|------------------------------------------|---------------|--------------|----------------|
| Z-Average (d.nm): 1582                   | Peak 1: 673.1 | 100.0        | 89.79          |
| Pdl: 0.796                               | Peak 2: 0.000 | 0.0          | 0.000          |
| Intercept: 0.944                         | Peak 3: 0.000 | 0.0          | 0.000          |
| Result quality : Refer to quality report |               |              |                |

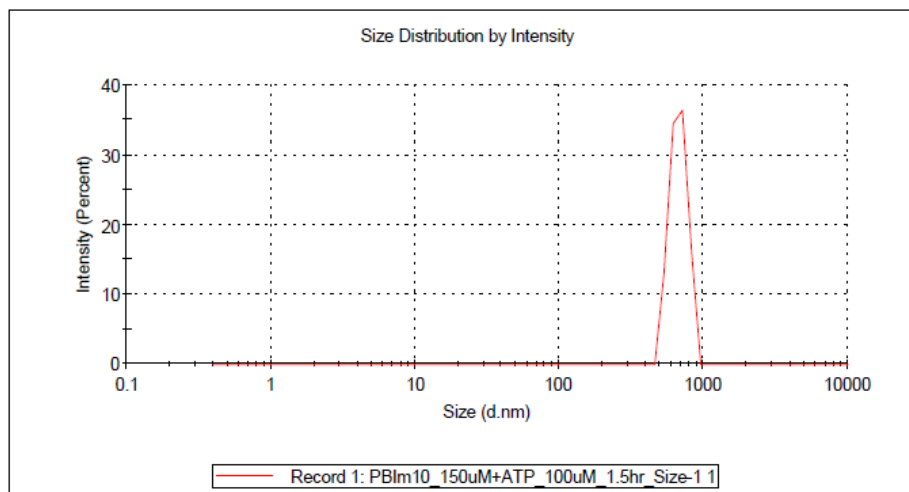

### E. Size of PBI<sub>m</sub>12 (75 $\mu$ M) with ATP (50 $\mu$ M)

#### Results

|                                          | Size (d.nm):  | % Intensity: | St Dev (d.nm): |
|------------------------------------------|---------------|--------------|----------------|
| Z-Average (d.nm): 1008                   | Peak 1: 812.3 | 91.8         | 183.6          |
| Pdl: 0.607                               | Peak 2: 158.8 | 8.2          | 34.93          |
| Intercept: 0.934                         | Peak 3: 0.000 | 0.0          | 0.000          |
| Result quality : Refer to quality report |               |              |                |

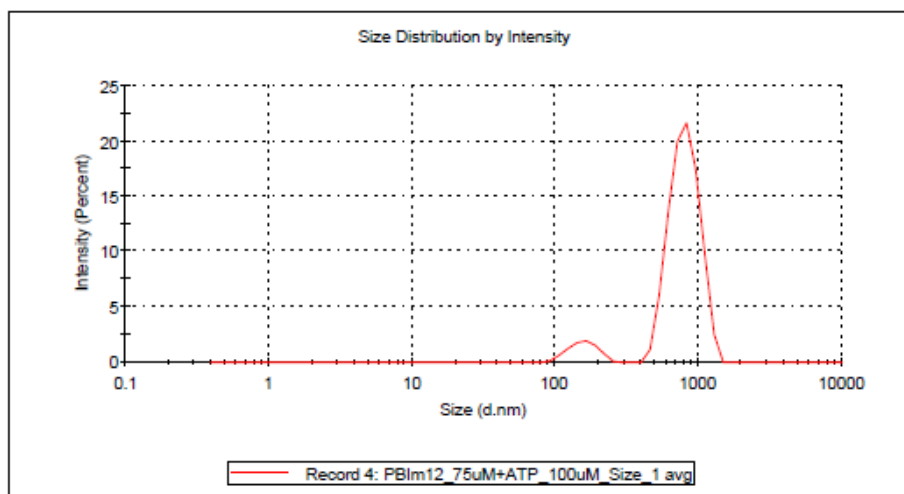

### F. Size of PBI<sub>m</sub>14 (50 $\mu$ M) with ATP (50 $\mu$ M)

#### Results

|                         | Size (d.nm):  | % Intensity: | St Dev (d.nm): |
|-------------------------|---------------|--------------|----------------|
| Z-Average (d.nm): 561.1 | Peak 1: 616.2 | 98.9         | 228.1          |
| Pdl: 0.184              | Peak 2: 4973  | 1.1          | 621.2          |
| Intercept: 0.936        | Peak 3: 0.000 | 0.0          | 0.000          |
| Result quality : Good   |               |              |                |

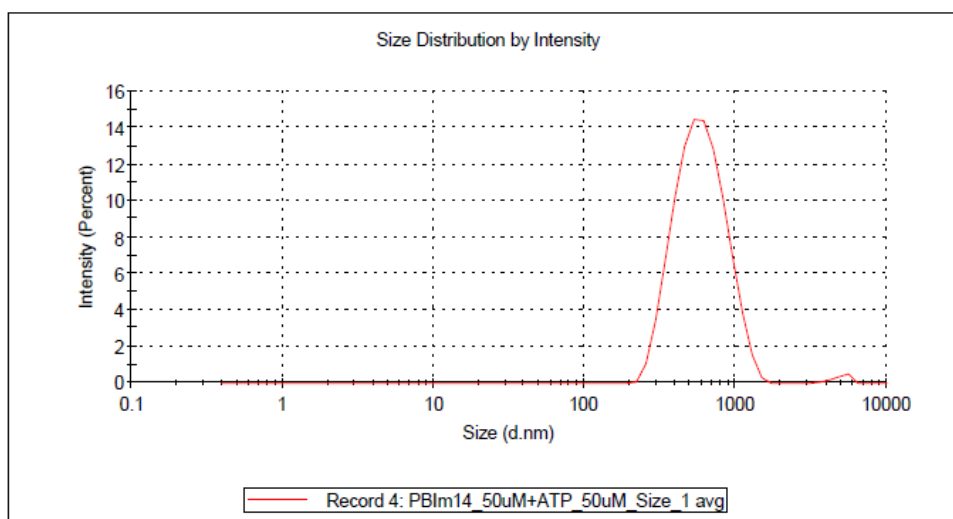

## G. Zeta of PBIm10 (150 $\mu$ M)

### Results

|                                   | Mean (mV)    | Area (%) | St Dev (mV) |
|-----------------------------------|--------------|----------|-------------|
| <b>Zeta Potential (mV): 2.74</b>  | Peak 1: 2.74 | 100.0    | 3.88        |
| <b>Zeta Deviation (mV): 3.88</b>  | Peak 2: 0.00 | 0.0      | 0.00        |
| <b>Conductivity (mS/cm): 1.25</b> | Peak 3: 0.00 | 0.0      | 0.00        |
| <b>Result quality : Good</b>      |              |          |             |

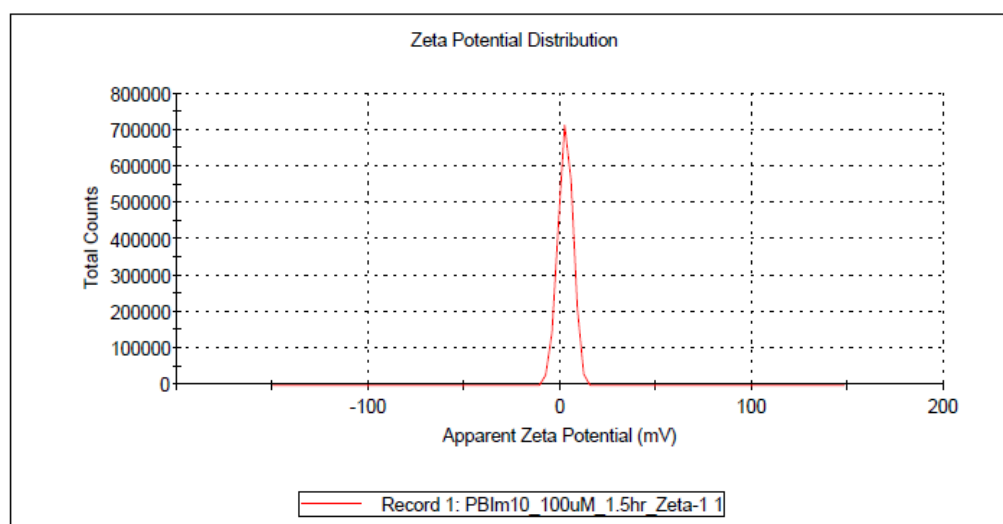

## H. Zeta of PBIm12 (75 $\mu$ M)

### Results

|                                   | Mean (mV)    | Area (%) | St Dev (mV) |
|-----------------------------------|--------------|----------|-------------|
| <b>Zeta Potential (mV): 2.41</b>  | Peak 1: 2.24 | 99.8     | 5.64        |
| <b>Zeta Deviation (mV): 5.53</b>  | Peak 2: 33.4 | 0.2      | 0.00        |
| <b>Conductivity (mS/cm): 1.39</b> | Peak 3: 0.00 | 0.0      | 0.00        |
| <b>Result quality : Good</b>      |              |          |             |

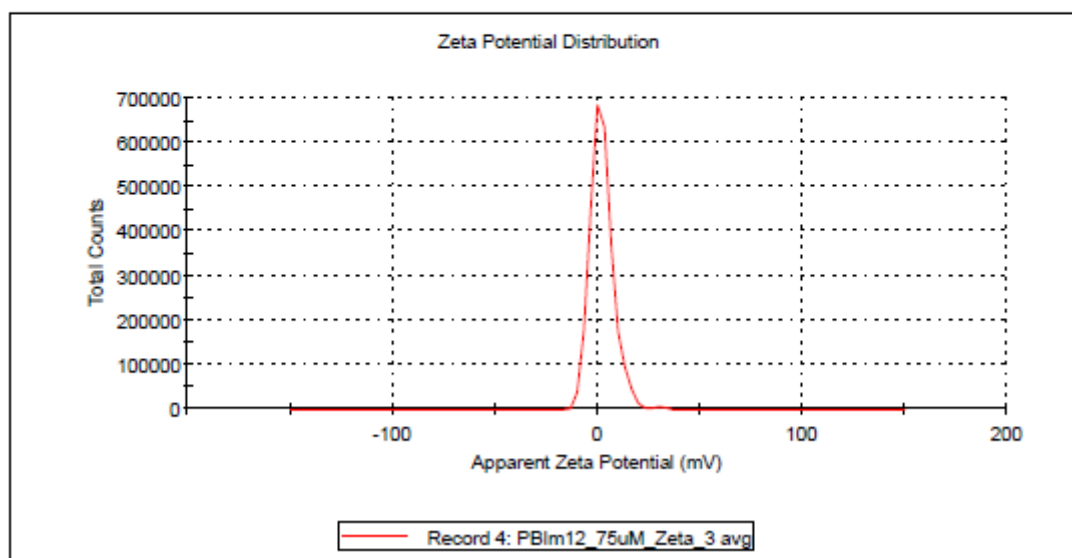

## I. Zeta of PBIm14 (50 $\mu$ M)

### Results

|                                   | Mean (mV)           | Area (%) | St Dev (mV) |
|-----------------------------------|---------------------|----------|-------------|
| <b>Zeta Potential (mV):</b> 3.35  | <b>Peak 1:</b> 2.91 | 100.0    | 6.13        |
| <b>Zeta Deviation (mV):</b> 6.06  | <b>Peak 2:</b> 0.00 | 0.0      | 0.00        |
| <b>Conductivity (mS/cm):</b> 1.39 | <b>Peak 3:</b> 0.00 | 0.0      | 0.00        |
| <b>Result quality :</b> Good      |                     |          |             |

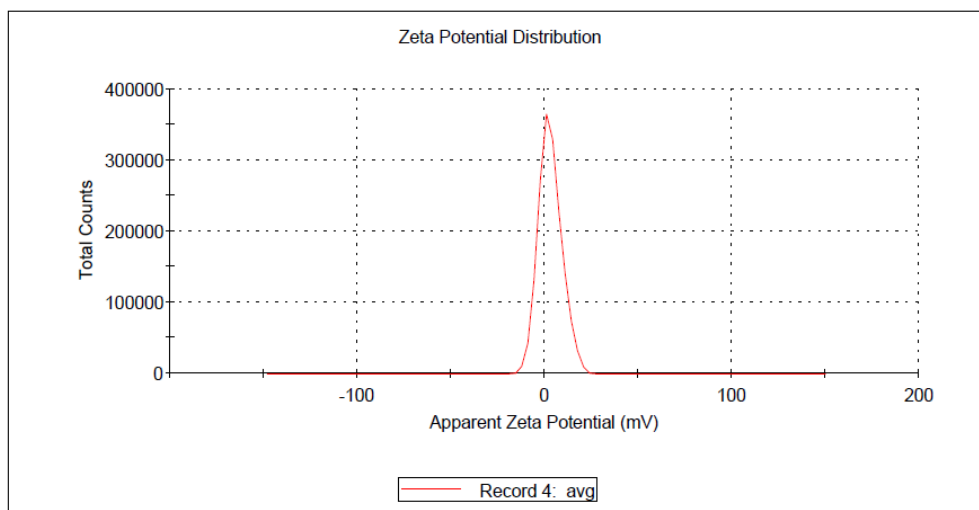

## J. Zeta of PBIm10 (150 $\mu$ M) with ATP (100 $\mu$ M)

### Results

|                                   | Mean (mV)            | Area (%) | St Dev (mV) |
|-----------------------------------|----------------------|----------|-------------|
| <b>Zeta Potential (mV):</b> -10.1 | <b>Peak 1:</b> -10.1 | 100.0    | 4.64        |
| <b>Zeta Deviation (mV):</b> 4.64  | <b>Peak 2:</b> 0.00  | 0.0      | 0.00        |
| <b>Conductivity (mS/cm):</b> 1.25 | <b>Peak 3:</b> 0.00  | 0.0      | 0.00        |
| <b>Result quality :</b> Good      |                      |          |             |

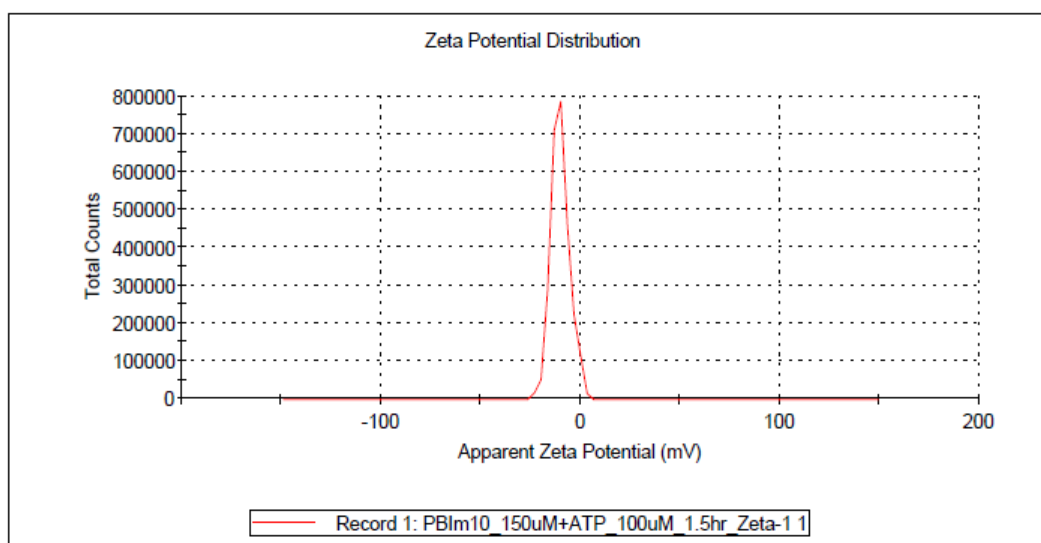

### K. Zeta of PBIm12 (75 $\mu$ M) with ATP (50 $\mu$ M)

#### Results

|                                   | Mean (mV)     | Area (%) | St Dev (mV) |
|-----------------------------------|---------------|----------|-------------|
| <b>Zeta Potential (mV): -8.02</b> | Peak 1: -7.98 | 100.0    | 4.88        |
| Zeta Deviation (mV): 4.61         | Peak 2: 0.00  | 0.0      | 0.00        |
| Conductivity (mS/cm): 1.39        | Peak 3: 0.00  | 0.0      | 0.00        |
| Result quality : Good             |               |          |             |

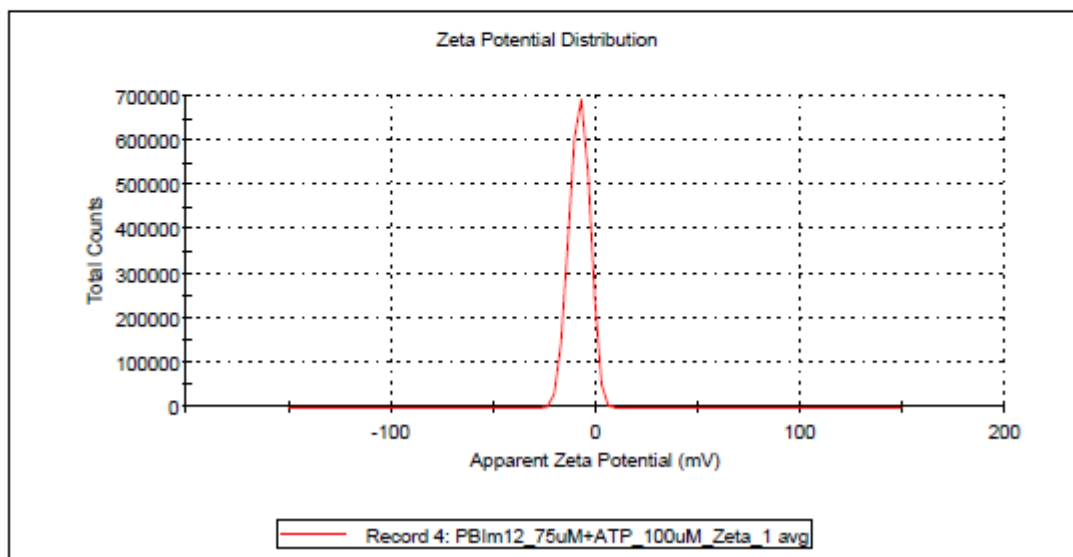

### L. Zeta of PBIm14 (50 $\mu$ M) with ATP (50 $\mu$ M)

#### Results

|                                   | Mean (mV)     | Area (%) | St Dev (mV) |
|-----------------------------------|---------------|----------|-------------|
| <b>Zeta Potential (mV): -4.98</b> | Peak 1: -4.99 | 100.0    | 6.84        |
| Zeta Deviation (mV): 6.67         | Peak 2: 0.00  | 0.0      | 0.00        |
| Conductivity (mS/cm): 1.44        | Peak 3: 0.00  | 0.0      | 0.00        |
| Result quality : Good             |               |          |             |

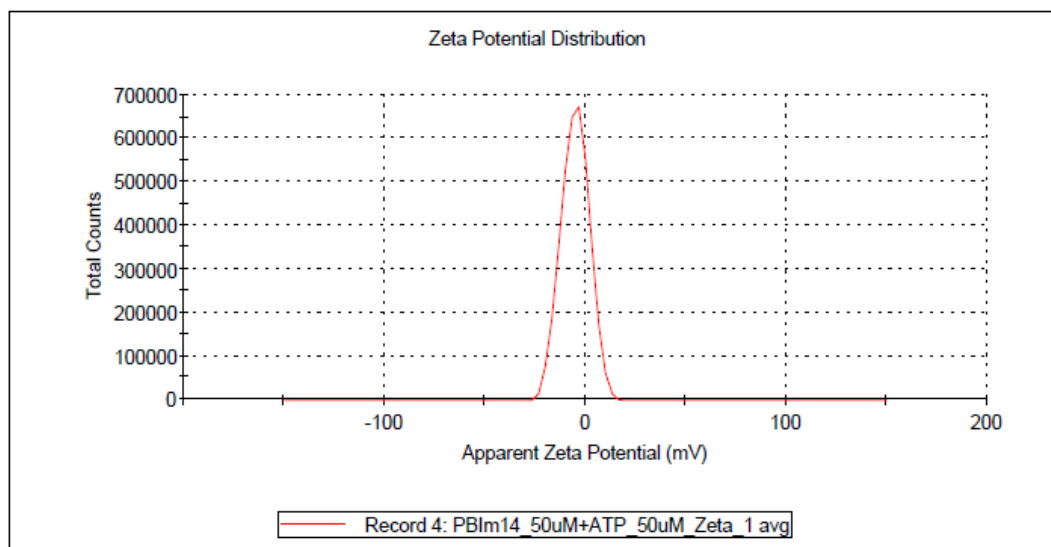

## 6. NMR spectra:

A.  $^1\text{H}$  NMR spectra of **1** (400 MHz,  $\text{CDCl}_3$ ):

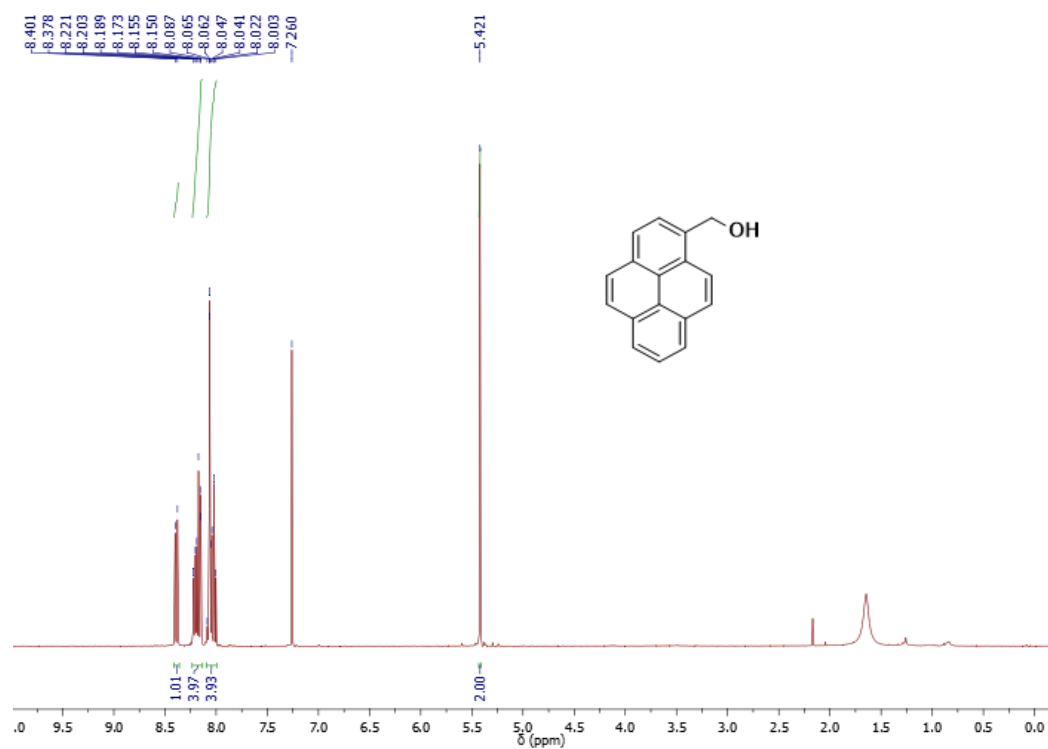

B.  $^1\text{H}$  NMR spectra of **2** (400 MHz,  $\text{CDCl}_3$ ):

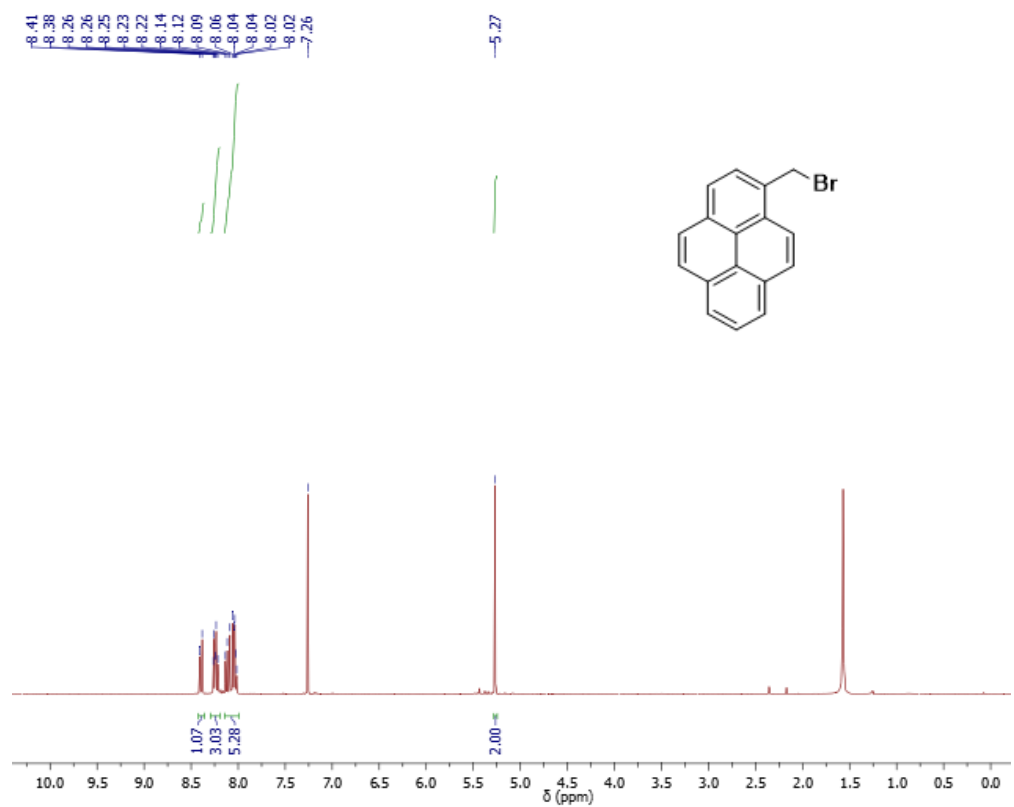

C.  $^1\text{H}$  NMR spectra of **Di(1H-imidazol-1-yl)methane** (400 MHz, DMSO- $\text{D}_6$ )

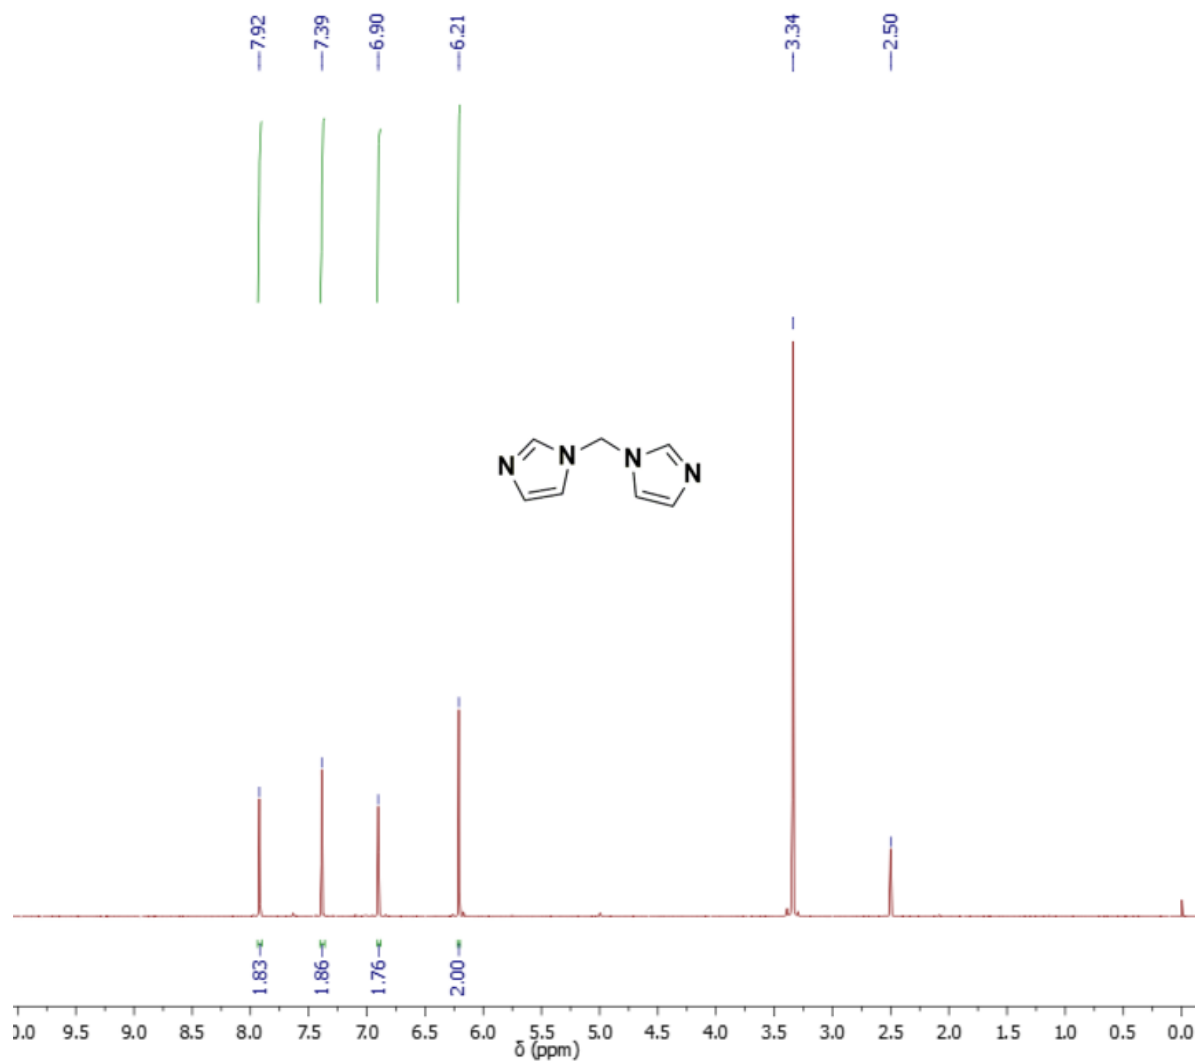

D.  $^1\text{H}$  NMR spectra of **BIm4** (400 MHz, DMSO- $\text{D}_6$ )

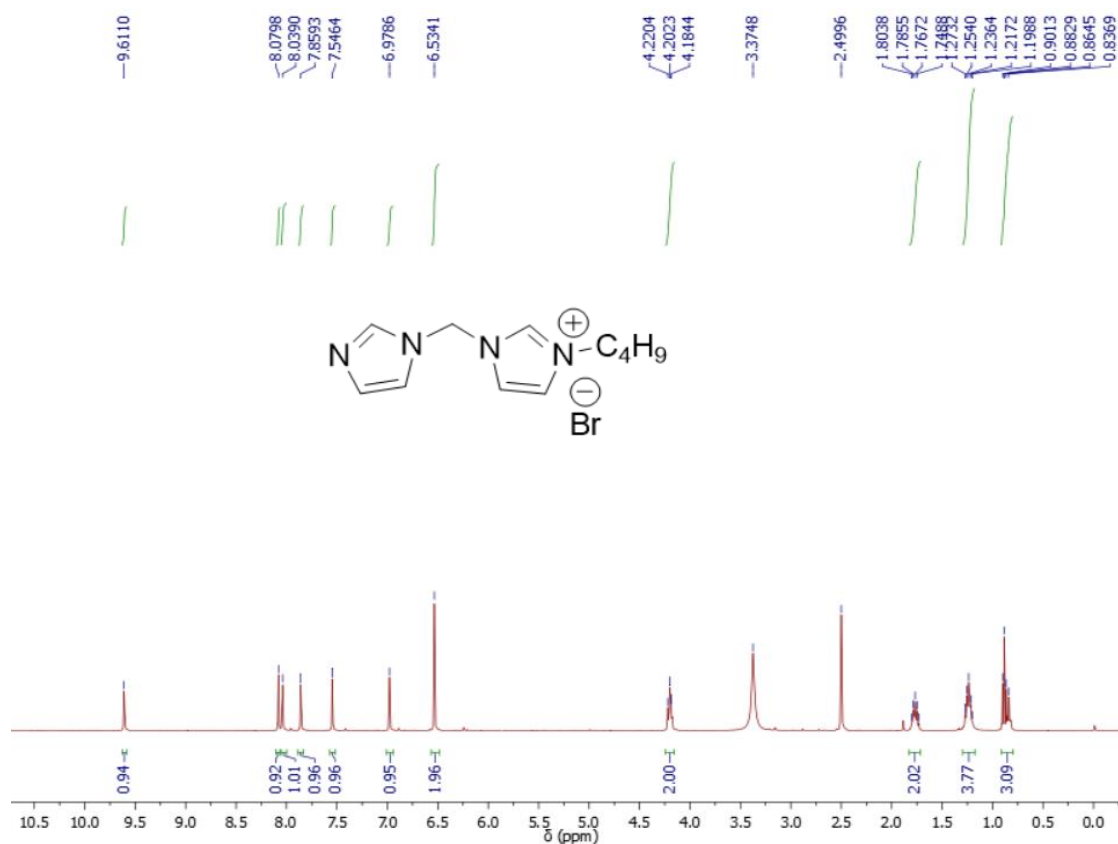

E.  $^{13}\text{C}$  NMR spectra of **BIm4** (100 MHz, DMSO- $\text{D}_6$ )

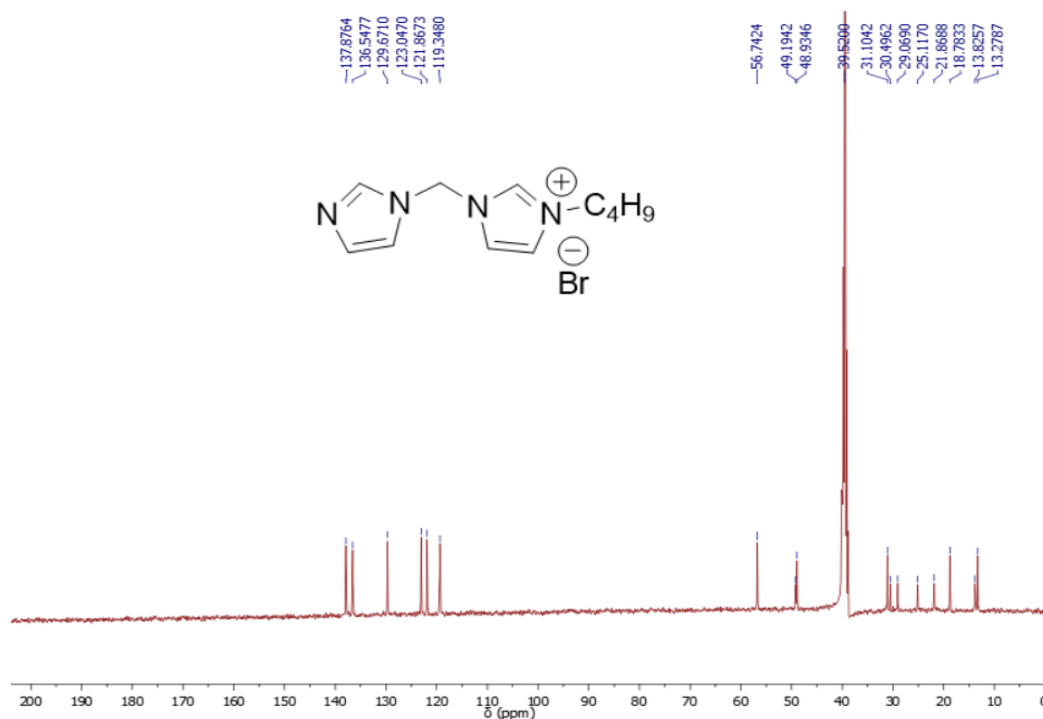



F.  $^1\text{H}$  NMR spectra of **BIm10** (400 MHz,  $\text{CDCl}_3$ )

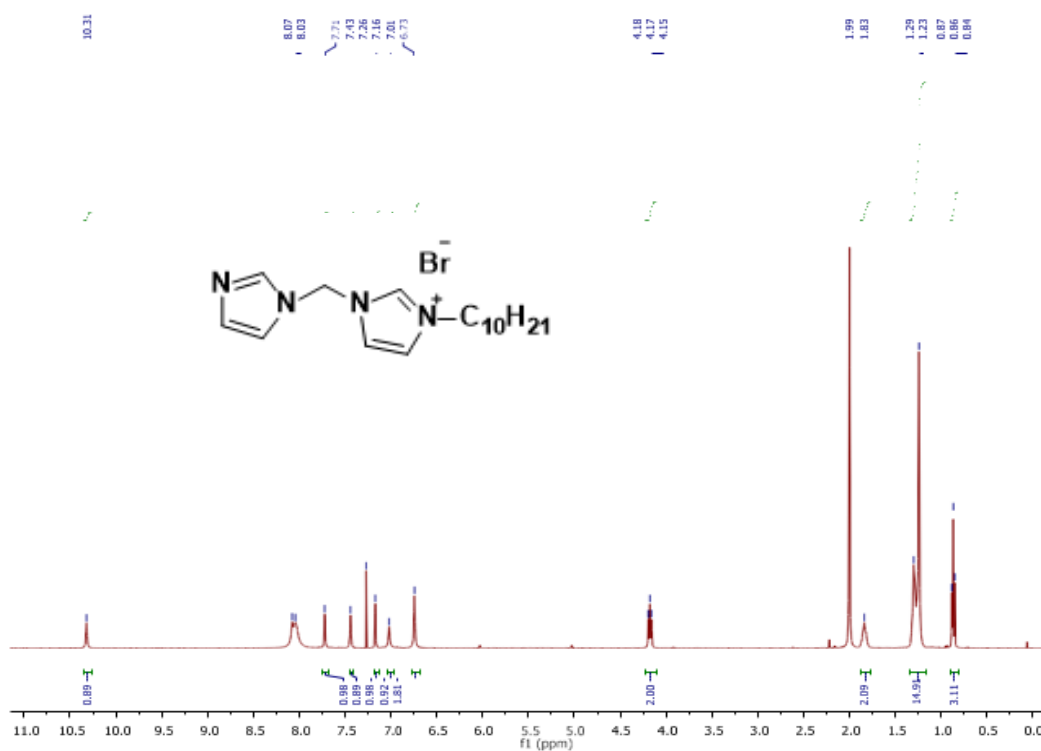

G.  $^{13}\text{C}$  NMR spectra of **BIm10** (100 MHz,  $\text{CDCl}_3$ )

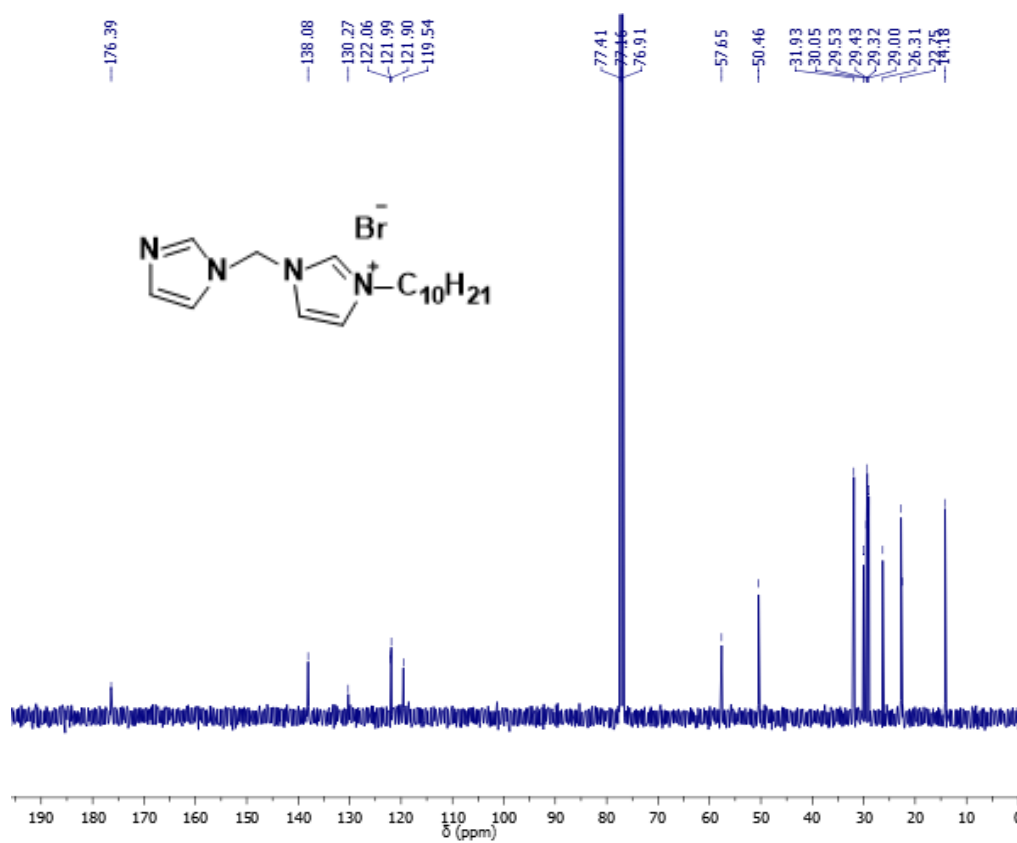

H.  $^1\text{H}$  NMR spectra of **BIm12** (400 MHz, DMSO- $\text{D}_6$ )

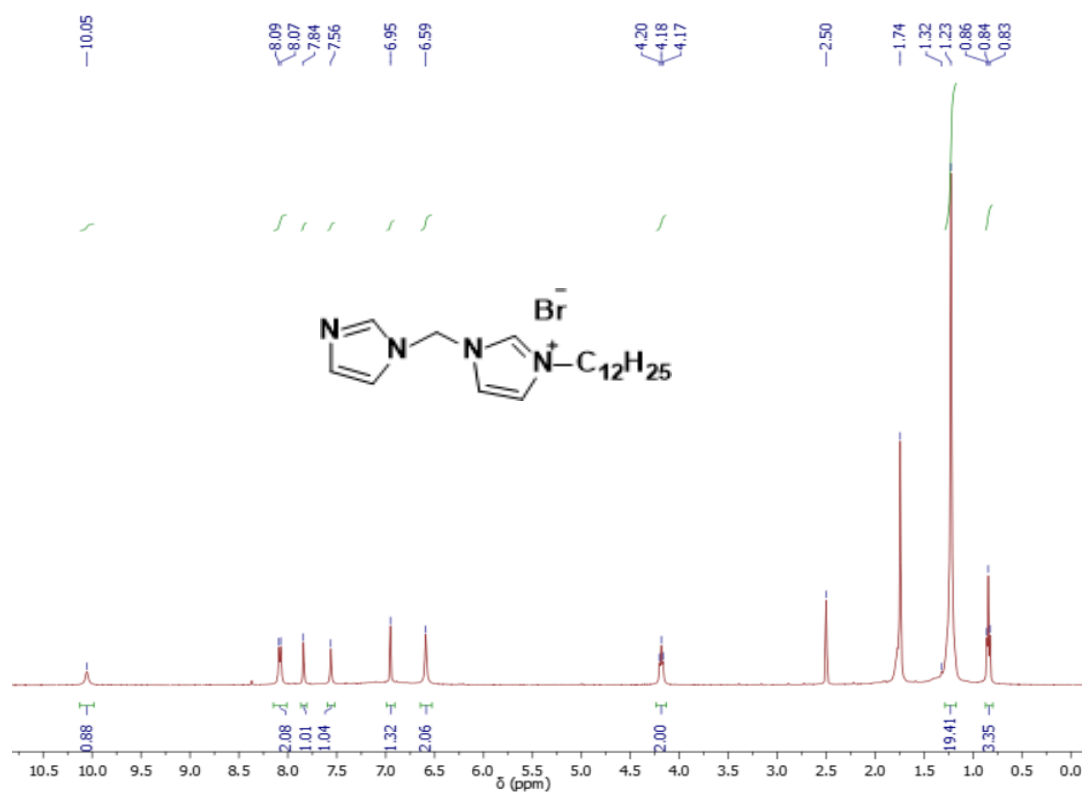

I.  $^{13}\text{C}$  NMR spectra of **BIm12** (100 MHz, DMSO- $\text{D}_6$ )

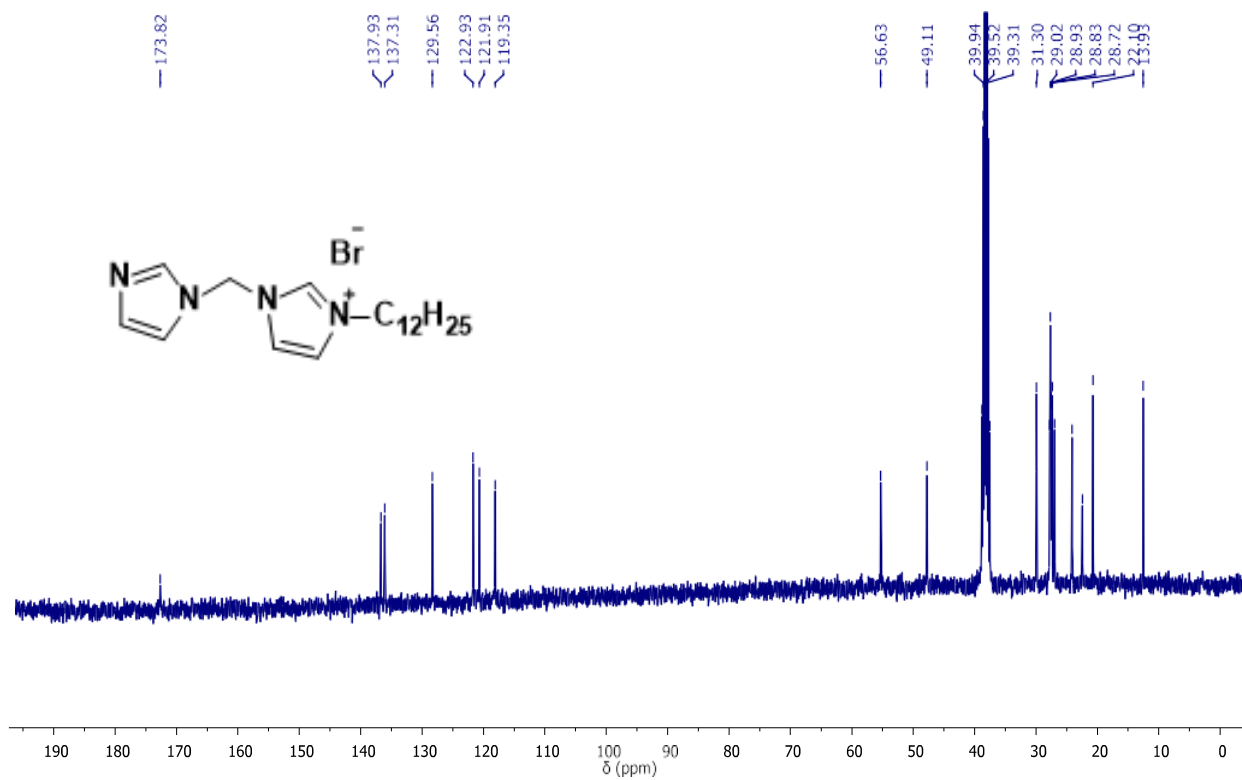

J.  $^1\text{H}$  NMR spectra of **BIm14** (400 MHz,  $\text{CDCl}_3$ )

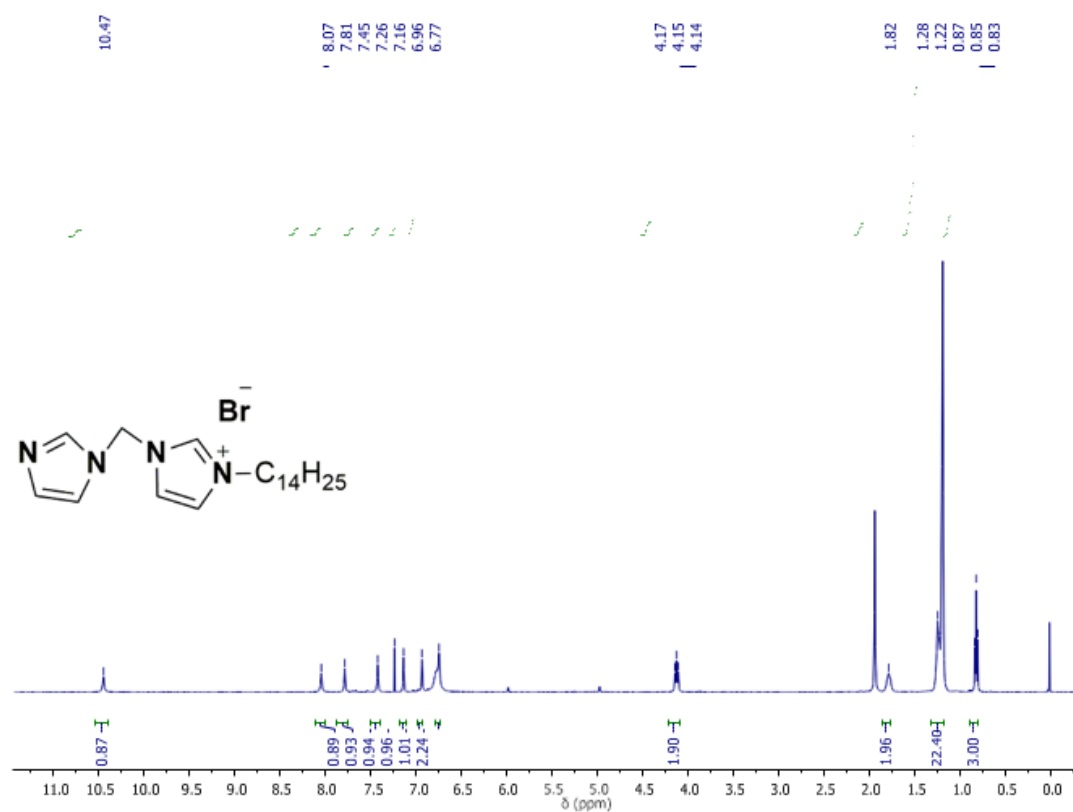

K.  $^{13}\text{C}$  NMR spectra of **BIm14** (100 MHz,  $\text{DMSO}-d_6$ )

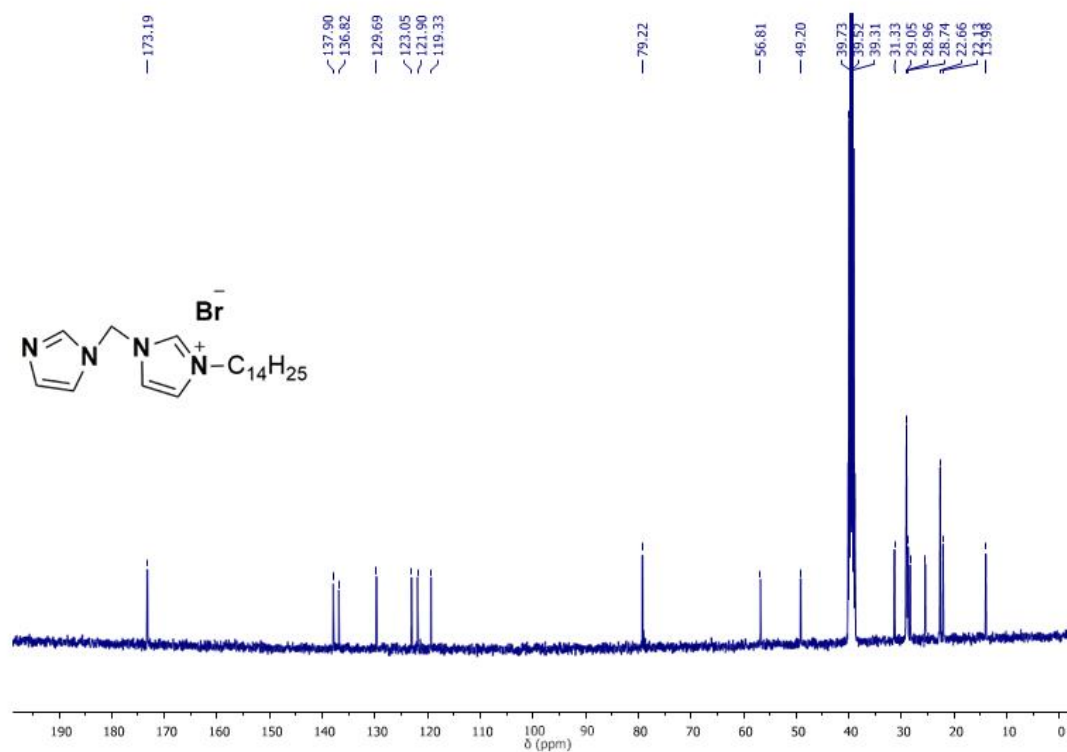

L.  $^1\text{H}$  NMR spectra of **PBIIm4** (400 MHz, DMSO- $\text{D}_6$ )

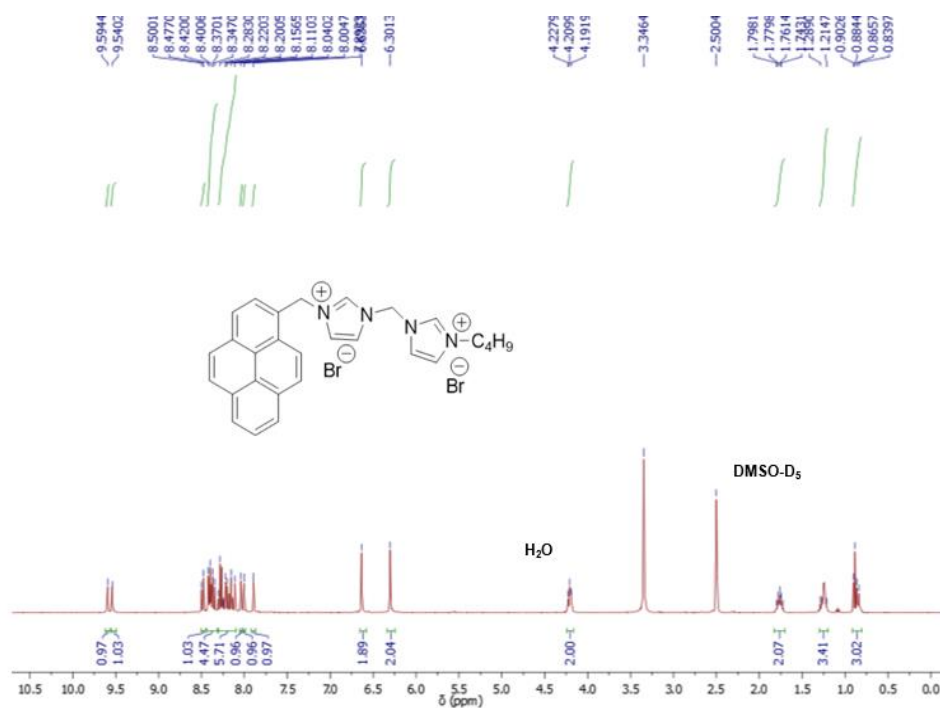

M.  $^{13}\text{C}$  NMR spectra of **PBIIm4** (100 MHz, DMSO- $\text{D}_6$ )

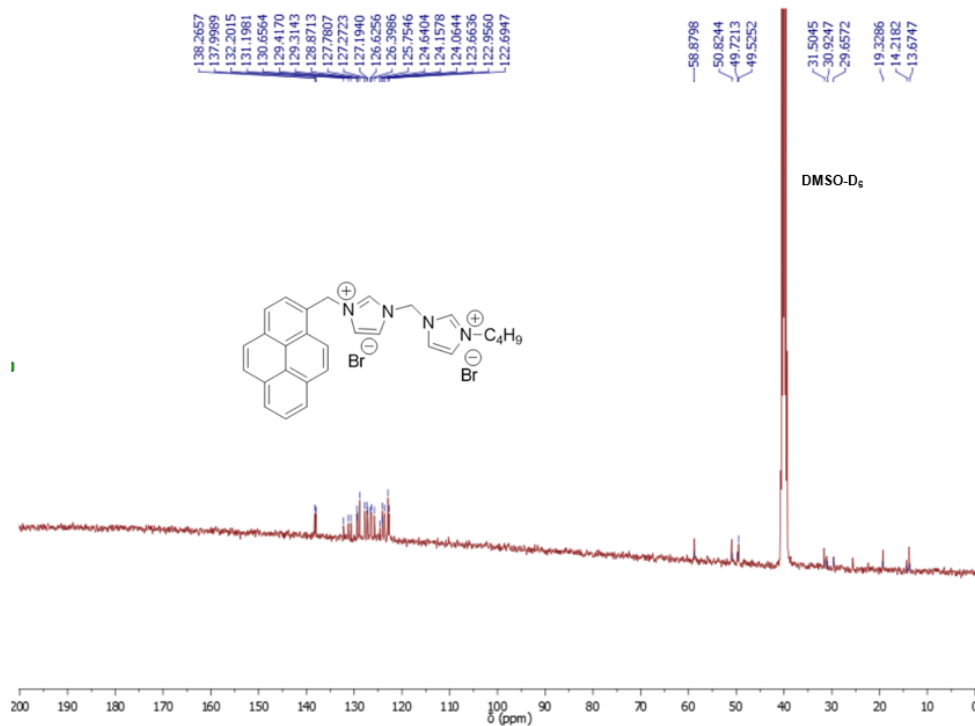

N.  $^1\text{H}$  NMR spectra of **PBIIm10** (400 MHz, DMSO- $\text{D}_6$ )

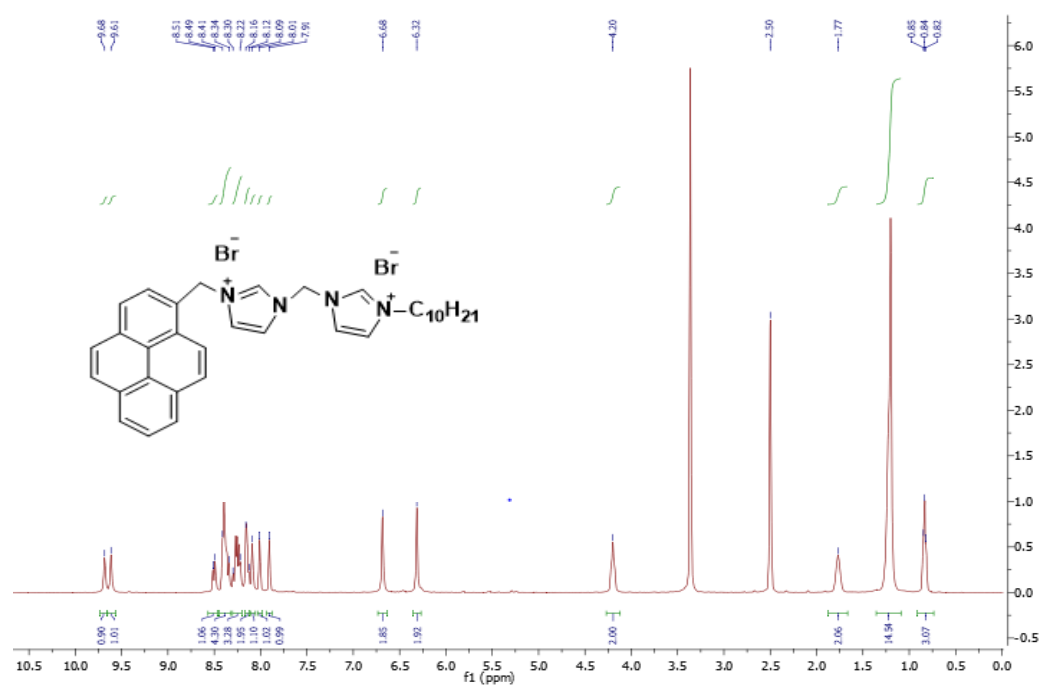

O.  $^{13}\text{C}$  NMR spectra of **PBIIm10** (100 MHz, DMSO- $\text{D}_6$ )

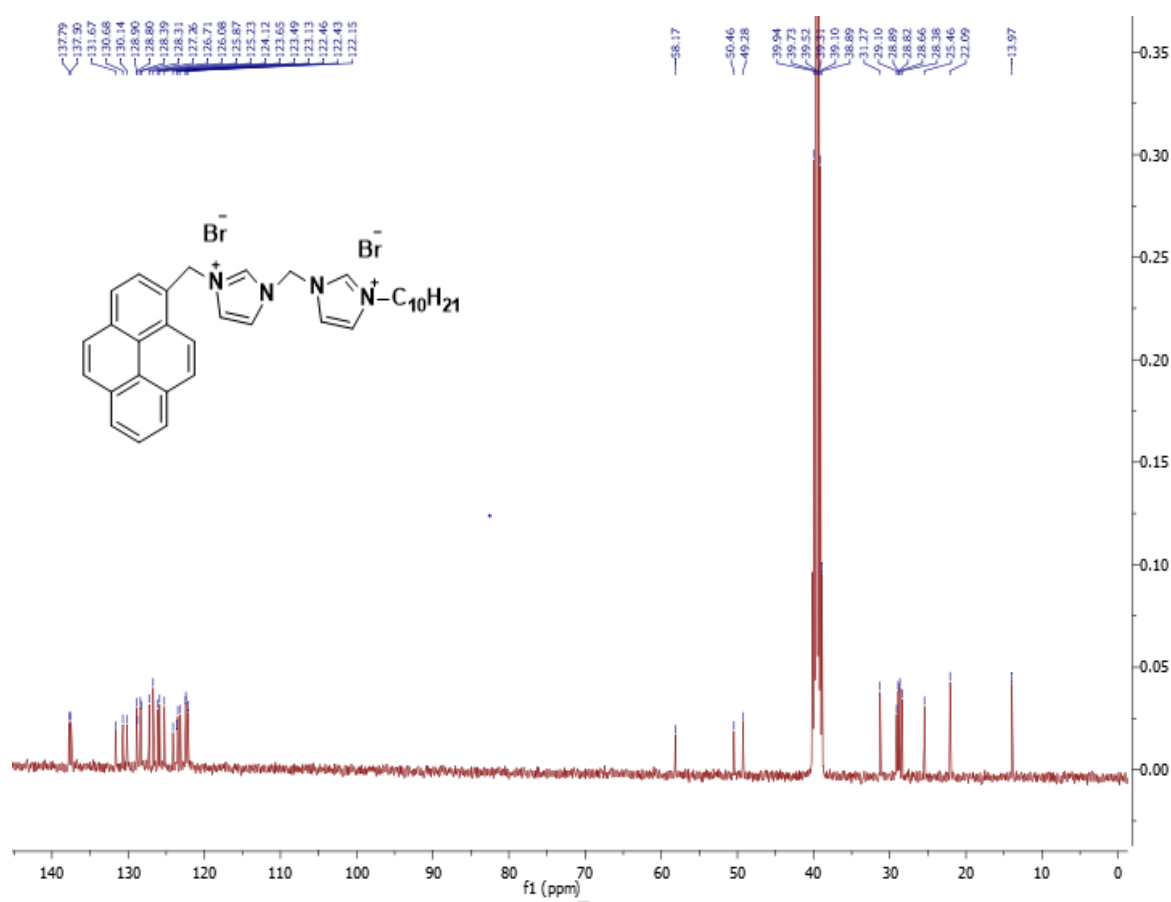

P.  $^1\text{H}$  NMR spectra of **PBIIm12** (400 MHz, DMSO- $\text{D}_6$ )

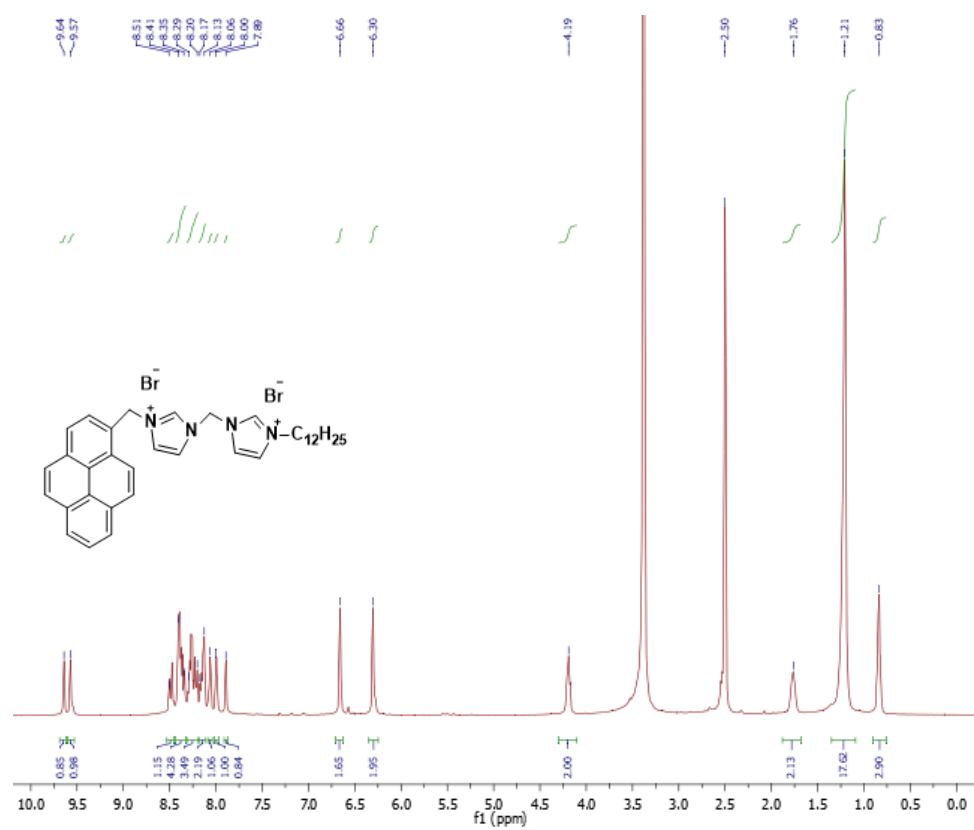

Q.  $^{13}\text{C}$  NMR spectra of **PBIIm12** (100 MHz, DMSO- $\text{D}_6$ )

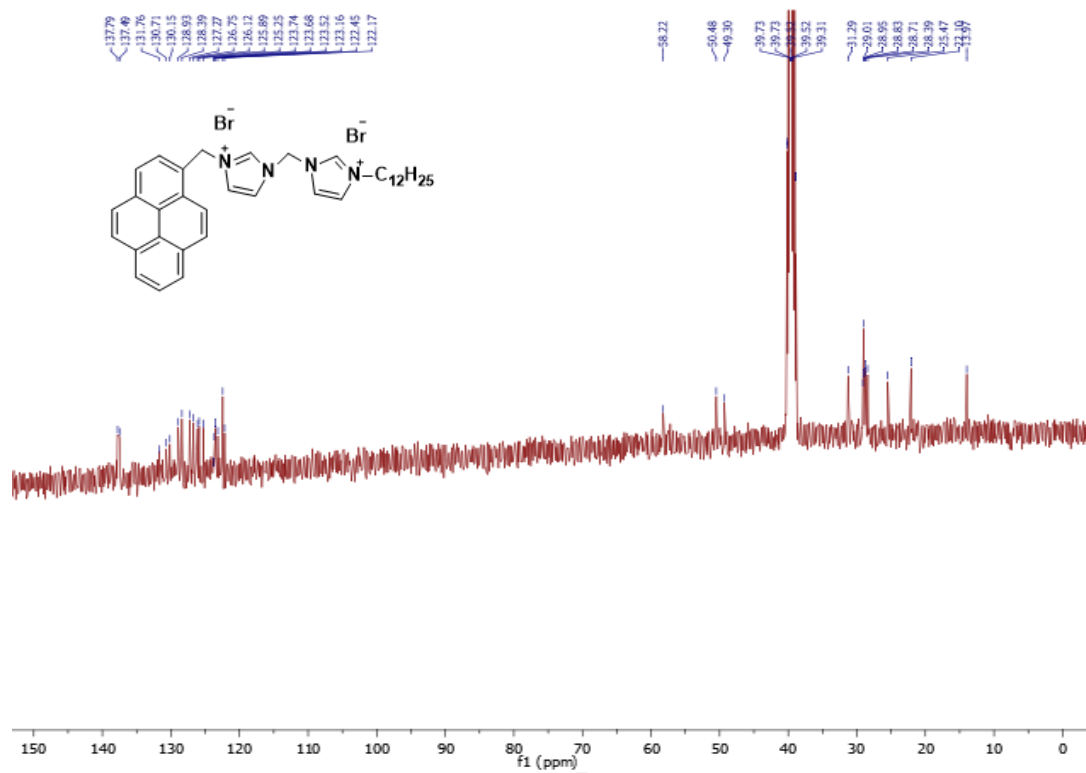

R.  $^1\text{H}$  NMR spectra of **PBIIm14** (400 MHz,  $\text{DMSO-D}_6$ )

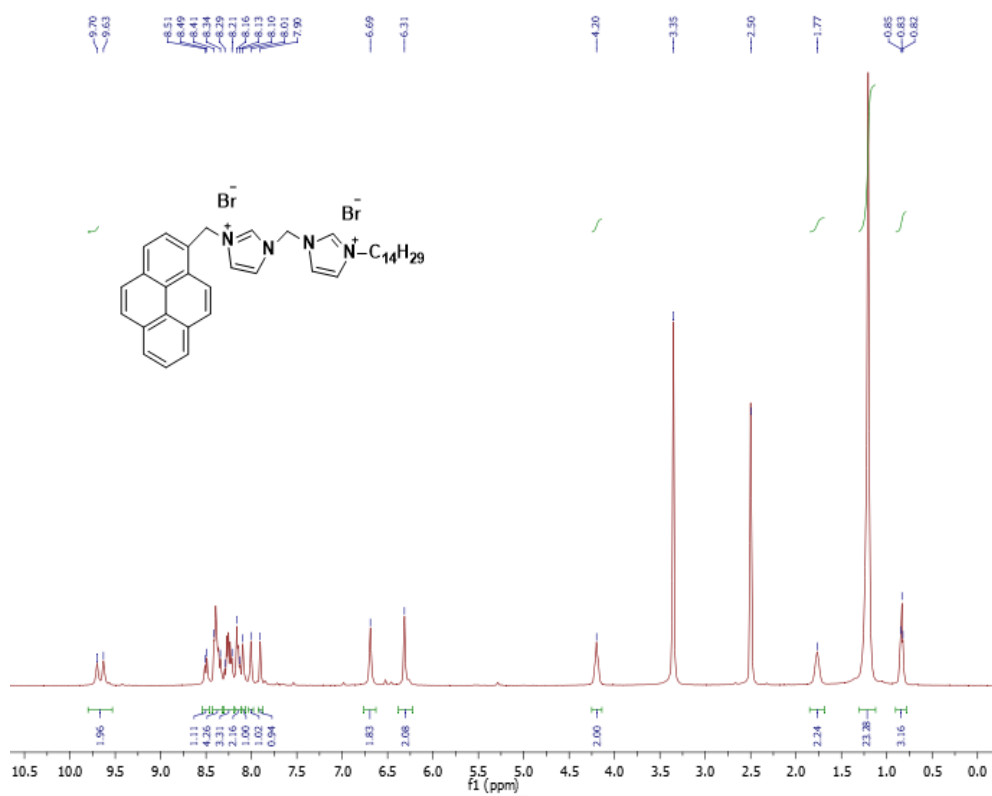

S.  $^{13}\text{C}$  NMR spectra of **PBIIm14** (100 MHz,  $\text{DMSO-D}_6$ )

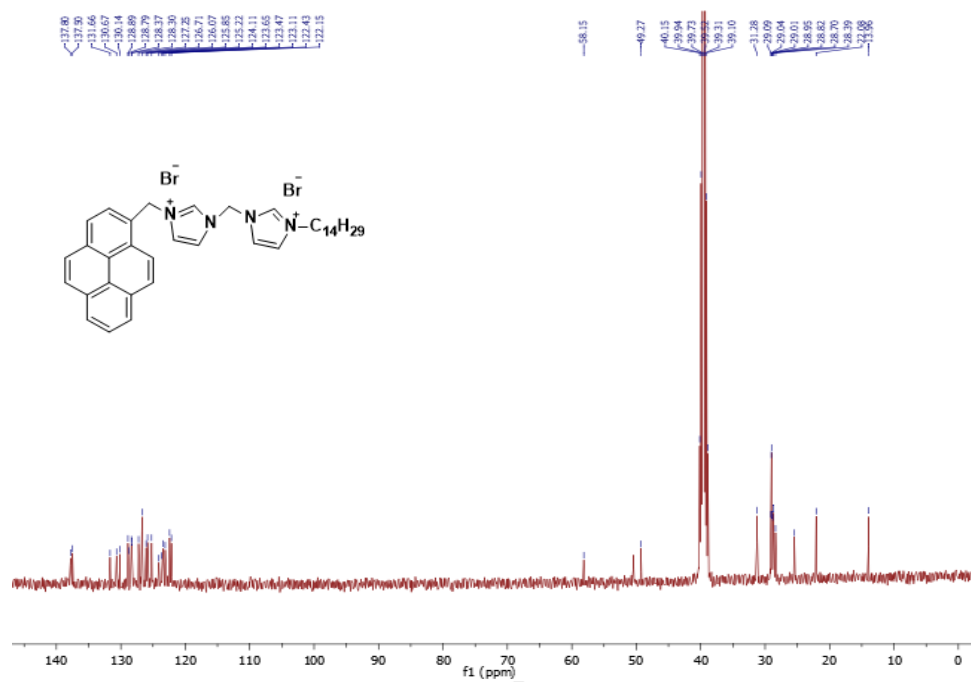

Supplement: Additional file 1 [file 1860-5397-16-223-S1.pdf]
